# Supplementary material for: TOX correlates with prognosis, immune infiltration, and T cells exhaustion in lung adenocarcinoma
Source: PubMed Central journal article supplement (PMC7520261; doi:10.1002/cam4.3324), 2020-07-23

a

## Gastric Cancer

OS

PFS

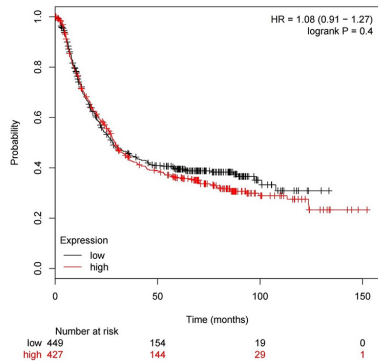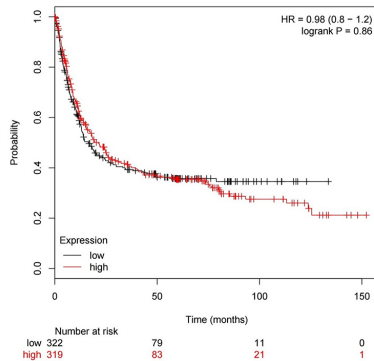

b

## Ovarian Cancer

OS

PFS

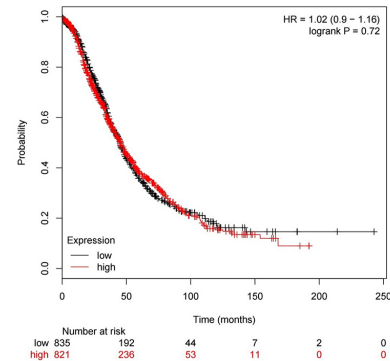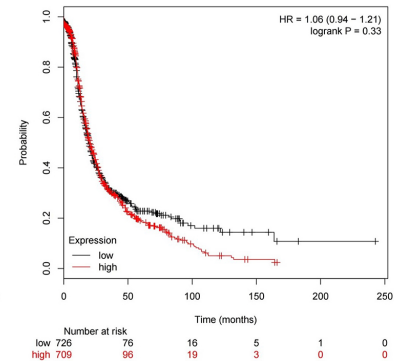

c

## UVM

Overall Survival

Disease Free Survival

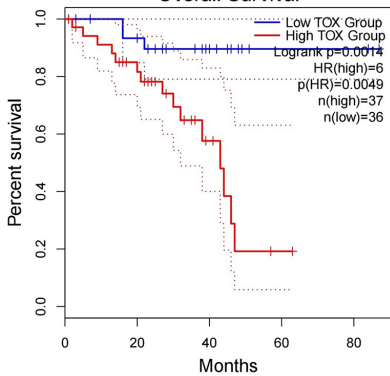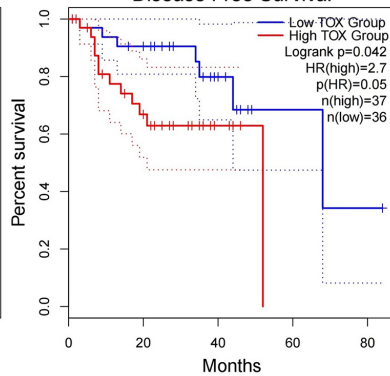

d

## SKCM

Overall Survival

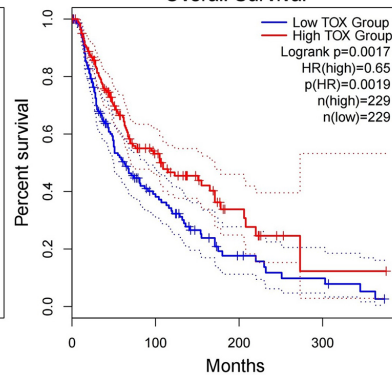

e

## SARC

Disease Free Survival

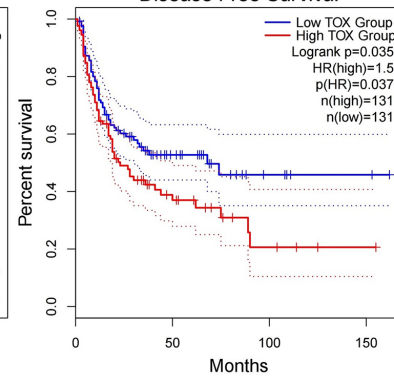

Supplement: CAM4-9-6694-s001.pdf [file CAM4-9-6694-s001.pdf]
