# Supplementary material for: TOX correlates with prognosis, immune infiltration, and T cells exhaustion in lung adenocarcinoma
Source: PubMed Central journal article supplement (PMC7520261; doi:10.1002/cam4.3324), 2020-07-23
Supplement: CAM4-9-6694-s002.pdf [file CAM4-9-6694-s002.pdf]

Supplementary Table 1. The effect of TOX expression to cancers survival by Prognoscan.

| DATASET         | CANCER TYPE    | SUBTYPE                     | ENDPOINT                         | COHORT                        | N   | CORRECTED P-VALUE | ln(HR-high / HR-low) | COX P-VALUE | ln(HR)     | HR [95% CI-low CI-upp] |
|-----------------|----------------|-----------------------------|----------------------------------|-------------------------------|-----|-------------------|----------------------|-------------|------------|------------------------|
| GSE5287         | Bladder cancer |                             | Overall Survival                 | Aarhus (1995-2004)            | 30  | -                 | -0.914659            | 0.407075    | -1.05085   | 0.35 [0.03 - 4.19]     |
| GSE5287         | Bladder cancer |                             | Overall Survival                 | Aarhus (1995-2004)            | 30  | -                 | -0.647532            | 0.894285    | 0.0555922  | 1.06 [0.47 - 2.40]     |
| GSE13507        | Bladder cancer |                             | Overall Survival                 | CNUH                          | 165 | 0.124826          | 0.643802             | 0.50948     | 0.156086   | 1.17 [0.74 - 1.86]     |
| GSE13507        | Bladder cancer | Transitional cell carcinoma | Disease Specific Survival        | CNUH                          | 165 | 0.0119049         | 1.20109              | 0.0387098   | 0.583462   | 1.79 [1.03 - 3.12]     |
| GSE12417-GPL96  | Blood cancer   | AML                         | Overall Survival                 | AMLCG (1999-2003)             | 163 | 0.15452           | 0.526661             | 0.197834    | 0.129466   | 1.14 [0.93 - 1.39]     |
| GSE12417-GPL96  | Blood cancer   | AML                         | Overall Survival                 | AMLCG (1999-2003)             | 163 | -                 | 0.276676             | 0.572628    | 0.200567   | 1.22 [0.61 - 2.45]     |
| GSE12417-GPL570 | Blood cancer   | AML                         | Overall Survival                 | AMLCG (2004)                  | 79  | -                 | -0.482153            | 0.65719     | 0.0568367  | 1.06 [0.82 - 1.36]     |
| GSE12417-GPL570 | Blood cancer   | AML                         | Overall Survival                 | AMLCG (2004)                  | 79  | 0.331329          | 1.10075              | 0.31986     | 0.259224   | 1.30 [0.78 - 2.16]     |
| GSE5122         | Blood cancer   | AML                         | Overall Survival                 | San Diego                     | 58  | -                 | -0.522784            | 0.914931    | -0.0268941 | 0.97 [0.59 - 1.59]     |
| GSE5122         | Blood cancer   | AML                         | Overall Survival                 | San Diego                     | 58  | -                 | -0.453435            | 0.51035     | -0.0926751 | 0.91 [0.69 - 1.20]     |
| GSE8970         | Blood cancer   | AML                         | Overall Survival                 | San Diego                     | 34  | -                 | 0.918409             | 0.248769    | 0.363023   | 1.44 [0.78 - 2.66]     |
| GSE8970         | Blood cancer   | AML                         | Overall Survival                 | San Diego                     | 34  | -                 | 0.750904             | 0.848625    | 0.0618267  | 1.06 [0.56 - 2.01]     |
| GSE4475         | Blood cancer   | B-cell lymphoma             | Overall Survival                 | Berlin (2003-2005)            | 158 | -                 | 0.626571             | 0.538256    | -0.167397  | 0.85 [0.50 - 1.44]     |
| GSE4475         | Blood cancer   | B-cell lymphoma             | Overall Survival                 | Berlin (2003-2005)            | 158 | 0.0873564         | -0.73368             | 0.085638    | -0.157159  | 0.85 [0.71 - 1.02]     |
| E-TABM-346      | Blood cancer   | DLBCL                       | Event Free Survival              | GELA (1998-2000)              | 53  | -                 | -0.647806            | 0.433173    | -0.141106  | 0.87 [0.61 - 1.24]     |
| E-TABM-346      | Blood cancer   | DLBCL                       | Overall Survival                 | GELA (1998-2000)              | 53  | -                 | -0.739008            | 0.321044    | -0.244983  | 0.78 [0.48 - 1.27]     |
| E-TABM-346      | Blood cancer   | DLBCL                       | Overall Survival                 | GELA (1998-2000)              | 53  | 0.351495          | -0.804017            | 0.454703    | -0.141399  | 0.87 [0.60 - 1.26]     |
| E-TABM-346      | Blood cancer   | DLBCL                       | Event Free Survival              | GELA (1998-2000)              | 53  | 0.345292          | -1.01893             | 0.127182    | -0.355502  | 0.70 [0.44 - 1.11]     |
| GSE16131-GPL96  | Blood cancer   | Follicular lymphoma         | Overall Survival                 | NCI (1974-2001)               | 180 | -                 | -0.365077            | 0.956611    | -0.0087616 | 0.99 [0.72 - 1.36]     |
| GSE16131-GPL96  | Blood cancer   | Follicular lymphoma         | Overall Survival                 | NCI (1974-2001)               | 180 | 0.491578          | -0.502126            | 0.3094      | -0.121864  | 0.89 [0.70 - 1.12]     |
| GSE2658         | Blood cancer   | Multiple myeloma            | Disease Specific Survival        | Arkansas                      | 559 | 0.409958          | -0.850534            | 0.867692    | -0.0138479 | 0.99 [0.84 - 1.16]     |
| GSE2658         | Blood cancer   | Multiple myeloma            | Disease Specific Survival        | Arkansas                      | 559 | 0.368575          | -0.772225            | 0.372878    | -0.0808553 | 0.92 [0.77 - 1.10]     |
| GSE4271-GPL96   | Brain cancer   | Astrocytoma                 | Overall Survival                 | MDA                           | 77  | -                 | -0.50651             | 0.620495    | -0.0803536 | 0.92 [0.67 - 1.27]     |
| GSE4271-GPL96   | Brain cancer   | Astrocytoma                 | Overall Survival                 | MDA                           | 77  | 0.0840459         | -0.778709            | 0.0219356   | -0.609338  | 0.54 [0.32 - 0.92]     |
| GSE7696         | Brain cancer   | Glioblastoma                | Overall Survival                 | Lausanne                      | 70  | -                 | -0.513583            | 0.301639    | -0.14431   | 0.87 [0.66 - 1.14]     |
| GSE7696         | Brain cancer   | Glioblastoma                | Overall Survival                 | Lausanne                      | 70  | 0.299848          | -0.604308            | 0.354544    | -0.257596  | 0.77 [0.45 - 1.33]     |
| MGH-glioma      | Brain cancer   | Glioma                      | Overall Survival                 | CBTTB, MGH, BWH, CH           | 50  | 0.356888          | -0.832587            | 0.158716    | -0.763598  | 0.47 [0.16 - 1.35]     |
| GSE4412-GPL96   | Brain cancer   | Glioma                      | Overall Survival                 | UCLA (1996-2003)              | 74  | 0.0507647         | -0.950625            | 0.022201    | -0.586317  | 0.56 [0.34 - 0.92]     |
| GSE4412-GPL96   | Brain cancer   | Glioma                      | Overall Survival                 | UCLA (1996-2003)              | 74  | 0.00214727        | -2.06988             | 0.000729339 | -0.654899  | 0.52 [0.36 - 0.76]     |
| GSE16581        | Brain cancer   | Meningioma                  | Overall Survival                 | UCLA                          | 67  | -                 | -15.3567             | 0.366924    | -1.12212   | 0.33 [0.03 - 3.73]     |
| GSE16581        | Brain cancer   | Meningioma                  | Overall Survival                 | UCLA                          | 67  | -                 | -1.28826             | 0.333829    | -0.321989  | 0.72 [0.38 - 1.39]     |
| GSE19615        | Breast cancer  |                             | Distant Metastasis Free Survival | DF/HCC                        | 115 | 0.465481          | -15.4059             | 0.520231    | -0.368669  | 0.69 [0.22 - 2.13]     |
| GSE19615        | Breast cancer  |                             | Distant Metastasis Free Survival | DF/HCC                        | 115 | -                 | 0.997147             | 0.197299    | 0.579299   | 1.78 [0.74 - 4.31]     |
| GSE3143         | Breast cancer  |                             | Overall Survival                 | Duke                          | 158 | -                 | 0.59123              | 0.959749    | 0.00891945 | 1.01 [0.71 - 1.43]     |
| GSE7849         | Breast cancer  |                             | Disease Free Survival            | Duke (1990-2001)              | 76  | -                 | 1.06352              | 0.545998    | 0.170968   | 1.19 [0.68 - 2.07]     |
| GSE12276        | Breast cancer  |                             | Relapse Free Survival            | EMC                           | 204 | 0.149094          | 0.382526             | 0.104956    | 0.132487   | 1.14 [0.97 - 1.34]     |
| GSE12276        | Breast cancer  |                             | Relapse Free Survival            | EMC                           | 204 | 0.482477          | -0.283119            | 0.42096     | -0.0576767 | 0.94 [0.82 - 1.09]     |
| GSE6532-GPL570  | Breast cancer  |                             | Relapse Free Survival            | GUYT                          | 87  | 0.203113          | -15.3262             | 0.0450446   | -0.565315  | 0.57 [0.33 - 0.99]     |
| GSE6532-GPL570  | Breast cancer  |                             | Relapse Free Survival            | GUYT                          | 87  | 0.137935          | -1.01747             | 0.108683    | -1.87618   | 0.15 [0.02 - 1.52]     |
| GSE6532-GPL570  | Breast cancer  |                             | Distant Metastasis Free Survival | GUYT                          | 87  | 0.203113          | -15.3262             | 0.0450446   | -0.565315  | 0.57 [0.33 - 0.99]     |
| GSE6532-GPL570  | Breast cancer  |                             | Distant Metastasis Free Survival | GUYT                          | 87  | 0.137935          | -1.01747             | 0.108683    | -1.87618   | 0.15 [0.02 - 1.52]     |
| GSE9195         | Breast cancer  |                             | Distant Metastasis Free Survival | GUYT2                         | 77  | 0.212113          | -1.54399             | 0.68265     | -0.699927  | 0.50 [0.02 - 14.23]    |
| GSE9195         | Breast cancer  |                             | Distant Metastasis Free Survival | GUYT2                         | 77  | 0.348256          | -1.29591             | 0.477198    | 0.232265   | 1.26 [0.66 - 2.39]     |
| GSE9195         | Breast cancer  |                             | Relapse Free Survival            | GUYT2                         | 77  | 0.384376          | -1.13038             | 0.757644    | 0.0953834  | 1.10 [0.60 - 2.02]     |
| GSE9195         | Breast cancer  |                             | Relapse Free Survival            | GUYT2                         | 77  | -                 | -0.813165            | 0.758058    | 0.433275   | 1.54 [0.10 - 24.29]    |
| GSE12093        | Breast cancer  |                             | Distant Metastasis Free Survival | IO, NCI, TUM, CCF (1992-2000) | 136 | -                 | 0.824707             | 0.482179    | -0.192839  | 0.82 [0.48 - 1.41]     |
| GSE12093        | Breast cancer  |                             | Distant Metastasis Free Survival | IO, NCI, TUM, CCF (1992-2000) | 136 | -                 | -0.745513            | 0.582749    | -0.125262  | 0.88 [0.56 - 1.38]     |
| GSE11121        | Breast cancer  |                             | Distant Metastasis Free Survival | Mainz (1988-1998)             | 200 | 0.377462          | 0.703638             | 0.915507    | 0.0261577  | 1.03 [0.63 - 1.66]     |
| GSE11121        | Breast cancer  |                             | Distant Metastasis Free Survival | Mainz (1988-1998)             | 200 | -                 | -0.655424            | 0.73455     | -0.0890043 | 0.91 [0.55 - 1.53]     |
| GSE1378         | Breast cancer  |                             | Relapse Free Survival            | MGH (1987-2000)               | 60  | -                 | 0.512303             | 0.851599    | -0.0610503 | 0.94 [0.50 - 1.78]     |
| GSE1379         | Breast cancer  |                             | Relapse Free Survival            | MGH (1987-2000)               | 60  | 9.73E-07          | -2.28945             | 0.0496781   | -0.702473  | 0.50 [0.25 - 1.00]     |
| GSE2034         | Breast cancer  |                             | Distant Metastasis Free Survival | Rotterdam (1980-1995)         | 286 | -                 | 0.383196             | 0.936178    | -0.0121586 | 0.99 [0.73 - 1.33]     |
| GSE2034         | Breast cancer  |                             | Distant Metastasis Free Survival | Rotterdam (1980-1995)         | 286 | -                 | -0.293596            | 0.852713    | -0.0331336 | 0.97 [0.68 - 1.37]     |
| GSE1456-GPL96   | Breast cancer  |                             | Relapse Free Survival            | Stockholm (1994-1996)         | 159 | -                 | 0.568427             | 0.835927    | 0.0496413  | 1.05 [0.66 - 1.68]     |
| GSE1456-GPL96   | Breast cancer  |                             | Overall Survival                 | Stockholm (1994-1996)         | 159 | 0.00507125        | -1.15866             | 0.0457792   | -0.520595  | 0.59 [0.36 - 0.99]     |
| GSE1456-GPL96   | Breast cancer  |                             | Disease Specific Survival        | Stockholm (1994-1996)         | 159 | -                 | -0.853497            | 0.529168    | -0.154325  | 0.86 [0.53 - 1.39]     |
| GSE1456-GPL96   | Breast cancer  |                             | Overall Survival                 | Stockholm (1994-1996)         | 159 | -                 | -0.599145            | 0.672811    | -0.0921011 | 0.91 [0.59 - 1.40]     |
| GSE1456-GPL96   | Breast cancer  |                             | Relapse Free Survival            | Stockholm (1994-1996)         | 159 | 0.079857          | -0.885977            | 0.40485     | -0.248723  | 0.78 [0.43 - 1.40]     |
| GSE1456-GPL96   | Breast cancer  |                             | Disease Specific Survival        | Stockholm (1994-1996)         | 159 | 0.00391594        | -1.39472             | 0.0359103   | -0.607672  | 0.54 [0.31 - 0.96]     |

|                   |                      |                         |                                  |                                                        |     |            |           |           |             |                     |
|-------------------|----------------------|-------------------------|----------------------------------|--------------------------------------------------------|-----|------------|-----------|-----------|-------------|---------------------|
| GSE7378           | Breast cancer        |                         | Disease Free Survival            | UCSF                                                   | 54  | -          | -1.16732  | 0.267177  | -2.84946    | 0.06 [0.00 - 8.88]  |
| GSE7378           | Breast cancer        |                         | Disease Free Survival            | UCSF                                                   | 54  | 0.299063   | -15.8312  | 0.0936868 | -2.8669     | 0.06 [0.00 - 1.62]  |
| E-TABM-158        | Breast cancer        |                         | Overall Survival                 | UCSF, CPMC (1989-1997)                                 | 117 | 0.397645   | -1.40607  | 0.240218  | -0.295838   | 0.74 [0.45 - 1.22]  |
| E-TABM-158        | Breast cancer        |                         | Distant Metastasis Free Survival | UCSF, CPMC (1989-1997)                                 | 117 | -          | -0.685174 | 0.524946  | -0.185641   | 0.83 [0.47 - 1.47]  |
| E-TABM-158        | Breast cancer        |                         | Relapse Free Survival            | UCSF, CPMC (1989-1997)                                 | 117 | 0.205722   | 1.60813   | 0.724756  | 0.338289    | 1.40 [0.21 - 9.22]  |
| E-TABM-158        | Breast cancer        |                         | Disease Specific Survival        | UCSF, CPMC (1989-1997)                                 | 117 | 0.334137   | 1.93119   | 0.89824   | 0.148104    | 1.16 [0.12 - 11.22] |
| E-TABM-158        | Breast cancer        |                         | Distant Metastasis Free Survival | UCSF, CPMC (1989-1997)                                 | 117 | -          | 0.752642  | 0.470433  | 0.829462    | 2.29 [0.24 - 21.80] |
| E-TABM-158        | Breast cancer        |                         | Overall Survival                 | UCSF, CPMC (1989-1997)                                 | 117 | 0.205722   | 1.60813   | 0.724756  | 0.338289    | 1.40 [0.21 - 9.22]  |
| E-TABM-158        | Breast cancer        |                         | Disease Specific Survival        | UCSF, CPMC (1989-1997)                                 | 117 | 0.153177   | -0.968461 | 0.102188  | -0.631566   | 0.53 [0.25 - 1.13]  |
| E-TABM-158        | Breast cancer        |                         | Relapse Free Survival            | UCSF, CPMC (1989-1997)                                 | 117 | 0.397645   | -1.40607  | 0.240218  | -0.295838   | 0.74 [0.45 - 1.22]  |
| GSE3494-GPL96     | Breast cancer        |                         | Disease Specific Survival        | Uppsala (1987-1989)                                    | 236 | 0.488775   | -0.52647  | 0.995754  | -0.00145953 | 1.00 [0.58 - 1.71]  |
| GSE3494-GPL96     | Breast cancer        |                         | Disease Specific Survival        | Uppsala (1987-1989)                                    | 236 | -          | 0.394543  | 0.486322  | 0.180981    | 1.20 [0.72 - 1.99]  |
| GSE4922-GPL96     | Breast cancer        |                         | Disease Free Survival            | Uppsala (1987-1989)                                    | 249 | 0.454917   | -0.430671 | 0.887475  | -0.0306102  | 0.97 [0.63 - 1.48]  |
| GSE4922-GPL96     | Breast cancer        |                         | Disease Free Survival            | Uppsala (1987-1989)                                    | 249 | -          | 0.431705  | 0.561868  | 0.115207    | 1.12 [0.76 - 1.66]  |
| GSE2990           | Breast cancer        |                         | Relapse Free Survival            | Uppsala, Oxford                                        | 62  | -          | -1.36394  | 0.61683   | -0.147222   | 0.86 [0.48 - 1.54]  |
| GSE2990           | Breast cancer        |                         | Distant Metastasis Free Survival | Uppsala, Oxford                                        | 125 | -          | -1.451    | 0.697863  | -0.116862   | 0.89 [0.49 - 1.61]  |
| GSE2990           | Breast cancer        |                         | Relapse Free Survival            | Uppsala, Oxford                                        | 125 | 0.103305   | -1.01433  | 0.77866   | -0.0660905  | 0.94 [0.59 - 1.48]  |
| GSE2990           | Breast cancer        |                         | Relapse Free Survival            | Uppsala, Oxford                                        | 62  | -          | 0.624519  | 0.812322  | -0.139805   | 0.87 [0.27 - 2.76]  |
| GSE2990           | Breast cancer        |                         | Distant Metastasis Free Survival | Uppsala, Oxford                                        | 54  | -          | -1.80077  | 0.536202  | -0.226278   | 0.80 [0.39 - 1.63]  |
| GSE2990           | Breast cancer        |                         | Distant Metastasis Free Survival | Uppsala, Oxford                                        | 125 | 0.469733   | 1.35915   | 0.421911  | 0.886458    | 2.43 [0.28 - 21.11] |
| GSE2990           | Breast cancer        |                         | Relapse Free Survival            | Uppsala, Oxford                                        | 125 | -          | 0.716513  | 0.808643  | 0.220766    | 1.25 [0.21 - 7.44]  |
| GSE2990           | Breast cancer        |                         | Distant Metastasis Free Survival | Uppsala, Oxford                                        | 54  | -          | 1.72306   | 0.873433  | -0.114047   | 0.89 [0.22 - 3.63]  |
| GSE7390           | Breast cancer        |                         | Overall Survival                 | Uppsala, Oxford, Stockholm, IGR, GUYT, CRH (1980-1998) | 198 | 0.121494   | -0.839205 | 0.226341  | -0.133524   | 0.88 [0.70 - 1.09]  |
| GSE7390           | Breast cancer        |                         | Distant Metastasis Free Survival | Uppsala, Oxford, Stockholm, IGR, GUYT, CRH (1980-1998) | 198 | -          | 0.600443  | 0.850834  | 0.0170532   | 1.02 [0.85 - 1.22]  |
| GSE7390           | Breast cancer        |                         | Overall Survival                 | Uppsala, Oxford, Stockholm, IGR, GUYT, CRH (1980-1998) | 198 | -          | 0.564955  | 0.96009   | 0.00467804  | 1.00 [0.84 - 1.21]  |
| GSE7390           | Breast cancer        |                         | Relapse Free Survival            | Uppsala, Oxford, Stockholm, IGR, GUYT, CRH (1980-1998) | 198 | -          | -0.440372 | 0.367299  | -0.0774222  | 0.93 [0.78 - 1.10]  |
| GSE7390           | Breast cancer        |                         | Relapse Free Survival            | Uppsala, Oxford, Stockholm, IGR, GUYT, CRH (1980-1998) | 198 | -          | -0.276044 | 0.650076  | -0.0330165  | 0.97 [0.84 - 1.12]  |
| GSE7390           | Breast cancer        |                         | Distant Metastasis Free Survival | Uppsala, Oxford, Stockholm, IGR, GUYT, CRH (1980-1998) | 198 | 0.21788    | -0.747658 | 0.204655  | -0.132156   | 0.88 [0.71 - 1.07]  |
| GSE12945          | Colorectal cancer    |                         | Disease Free Survival            | Berlin                                                 | 51  | 0.304126   | -16.2274  | 0.154904  | -1.54727    | 0.21 [0.03 - 1.79]  |
| GSE12945          | Colorectal cancer    |                         | Overall Survival                 | Berlin                                                 | 62  | 0.216632   | -1.48632  | 0.111395  | -0.812956   | 0.44 [0.16 - 1.21]  |
| GSE12945          | Colorectal cancer    |                         | Disease Free Survival            | Berlin                                                 | 51  | 0.171114   | -2.30848  | 0.081331  | -5.45647    | 0.00 [0.00 - 1.97]  |
| GSE12945          | Colorectal cancer    |                         | Overall Survival                 | Berlin                                                 | 62  | 0.440131   | -1.44824  | 0.165159  | -1.87145    | 0.15 [0.01 - 2.16]  |
| GSE17536          | Colorectal cancer    |                         | Disease Specific Survival        | MCC                                                    | 177 | -          | -0.438602 | 0.0728629 | 0.513631    | 1.67 [0.95 - 2.93]  |
| GSE17536          | Colorectal cancer    |                         | Overall Survival                 | MCC                                                    | 177 | -          | -0.464086 | 0.864087  | 0.0215462   | 1.02 [0.80 - 1.31]  |
| GSE17536          | Colorectal cancer    |                         | Disease Specific Survival        | MCC                                                    | 177 | -          | -0.553988 | 0.428353  | 0.110753    | 1.12 [0.85 - 1.47]  |
| GSE17536          | Colorectal cancer    |                         | Overall Survival                 | MCC                                                    | 177 | -          | -0.335682 | 0.231035  | 0.329449    | 1.39 [0.81 - 2.38]  |
| GSE17536          | Colorectal cancer    |                         | Disease Free Survival            | MCC                                                    | 145 | 0.00212818 | -1.33784  | 0.479681  | -0.137206   | 0.87 [0.60 - 1.28]  |
| GSE17536          | Colorectal cancer    |                         | Disease Free Survival            | MCC                                                    | 145 | -          | -0.44028  | 0.832301  | -0.105851   | 0.90 [0.34 - 2.40]  |
| GSE14333          | Colorectal cancer    |                         | Disease Free Survival            | Melbourne                                              | 226 | 0.107761   | -0.851047 | 0.230472  | -0.165758   | 0.85 [0.65 - 1.11]  |
| GSE14333          | Colorectal cancer    |                         | Disease Free Survival            | Melbourne                                              | 226 | -          | -0.49046  | 0.576476  | -0.0829036  | 0.92 [0.69 - 1.23]  |
| GSE17537          | Colorectal cancer    |                         | Disease Specific Survival        | VMC                                                    | 49  | -          | 0.722707  | 0.748343  | 0.113285    | 1.12 [0.56 - 2.24]  |
| GSE17537          | Colorectal cancer    |                         | Overall Survival                 | VMC                                                    | 55  | 0.33542    | 0.972005  | 0.704135  | 0.0961675   | 1.10 [0.67 - 1.81]  |
| GSE17537          | Colorectal cancer    |                         | Overall Survival                 | VMC                                                    | 55  | -          | 15.2877   | 0.893685  | 0.077835    | 1.08 [0.35 - 3.39]  |
| GSE17537          | Colorectal cancer    |                         | Disease Free Survival            | VMC                                                    | 55  | -          | -0.731887 | 0.552902  | -0.453664   | 0.64 [0.14 - 2.84]  |
| GSE17537          | Colorectal cancer    |                         | Disease Specific Survival        | VMC                                                    | 49  | -          | 15.3584   | 0.391922  | 0.691785    | 2.00 [0.41 - 9.73]  |
| GSE17537          | Colorectal cancer    |                         | Disease Free Survival            | VMC                                                    | 55  | 0.334662   | -1.23721  | 0.188496  | -0.431707   | 0.65 [0.34 - 1.24]  |
| GSE22138          | Eye cancer           | Uveal melanoma          | Distant Metastasis Free Survival | BRCIC                                                  | 63  | -          | -0.746515 | 0.844147  | -0.0392081  | 0.96 [0.65 - 1.42]  |
| GSE22138          | Eye cancer           | Uveal melanoma          | Distant Metastasis Free Survival | BRCIC                                                  | 63  | 0.107588   | -0.970716 | 0.148597  | -7.079      | 0.00 [0.00 - 12.51] |
| GSE2837           | Head and neck cancer | Squamous cell carcinoma | Relapse Free Survival            | VUMC, VAMC, UTM-DACC (1992-2005)                       | 28  | -          | 1.05681   | 0.357221  | 0.254123    | 1.29 [0.75 - 2.21]  |
| GSE2837           | Head and neck cancer | Squamous cell carcinoma | Relapse Free Survival            | VUMC, VAMC, UTM-DACC (1992-2005)                       | 28  | -          | -0.913687 | 0.968648  | 0.0893119   | 1.09 [0.01 - 93.97] |
| jacob-00182-CANDF | Lung cancer          | Adenocarcinoma          | Overall Survival                 | CAN/DF                                                 | 82  | -          | 0.556652  | 0.66758   | 0.111884    | 1.12 [0.67 - 1.86]  |
| jacob-00182-CANDF | Lung cancer          | Adenocarcinoma          | Overall Survival                 | CAN/DF                                                 | 82  | -          | -0.341307 | 0.624133  | 0.202288    | 1.22 [0.55 - 2.75]  |

|                 |                    |                         |                                  |                                    |     |             |           |             |             |                     |
|-----------------|--------------------|-------------------------|----------------------------------|------------------------------------|-----|-------------|-----------|-------------|-------------|---------------------|
| jacob-00182-HLM | Lung cancer        | Adenocarcinoma          | Overall Survival                 | HLM                                | 79  | -           | 0.471047  | 0.960589    | 0.010045    | 1.01 [0.68 - 1.50]  |
| jacob-00182-HLM | Lung cancer        | Adenocarcinoma          | Overall Survival                 | HLM                                | 79  | -           | -0.454799 | 0.860853    | -0.0611694  | 0.94 [0.47 - 1.86]  |
| jacob-00182-MSK | Lung cancer        | Adenocarcinoma          | Overall Survival                 | MSK                                | 104 | 0.0908584   | -1.18713  | 0.29472     | -0.420624   | 0.66 [0.30 - 1.44]  |
| jacob-00182-MSK | Lung cancer        | Adenocarcinoma          | Overall Survival                 | MSK                                | 104 | 0.0302494   | -1.12163  | 0.0174422   | -0.724217   | 0.48 [0.27 - 0.88]  |
| GSE13213        | Lung cancer        | Adenocarcinoma          | Overall Survival                 | Nagoya (1995-1999, 2002-2004)      | 117 | 0.0651012   | -1.00806  | 0.122391    | -0.179365   | 0.84 [0.67 - 1.05]  |
| GSE13213        | Lung cancer        | Adenocarcinoma          | Overall Survival                 | Nagoya (1995-1999, 2002-2004)      | 117 | 0.0217806   | -0.933498 | 0.0202096   | -0.249642   | 0.78 [0.63 - 0.96]  |
| GSE31210        | Lung cancer        | Adenocarcinoma          | Overall Survival                 | NCCRI                              | 204 | 0.000246913 | -1.53366  | 7.17E-05    | -0.75405    | 0.47 [0.32 - 0.68]  |
| GSE31210        | Lung cancer        | Adenocarcinoma          | Relapse Free Survival            | NCCRI                              | 204 | 1.16E-06    | -1.42107  | 2.07E-07    | -0.796492   | 0.45 [0.33 - 0.61]  |
| GSE31210        | Lung cancer        | Adenocarcinoma          | Overall Survival                 | NCCRI                              | 204 | 0.0926995   | -0.992353 | 0.0124348   | -0.679971   | 0.51 [0.30 - 0.86]  |
| GSE31210        | Lung cancer        | Adenocarcinoma          | Relapse Free Survival            | NCCRI                              | 204 | 6.22E-05    | -1.28275  | 0.000108688 | -0.786384   | 0.46 [0.31 - 0.68]  |
| jacob-00182-UM  | Lung cancer        | Adenocarcinoma          | Overall Survival                 | UM                                 | 178 | 0.24635     | -0.469638 | 0.363868    | -0.14732    | 0.86 [0.63 - 1.19]  |
| jacob-00182-UM  | Lung cancer        | Adenocarcinoma          | Overall Survival                 | UM                                 | 178 | 0.0226025   | -0.654766 | 0.00822172  | -0.606555   | 0.55 [0.35 - 0.85]  |
| GSE3141         | Lung cancer        | NSCLC                   | Overall Survival                 | Duke                               | 111 | -           | -0.462839 | 0.276982    | -0.182875   | 0.83 [0.60 - 1.16]  |
| GSE3141         | Lung cancer        | NSCLC                   | Overall Survival                 | Duke                               | 111 | 0.444559    | -0.692436 | 0.992823    | -0.00126138 | 1.00 [0.76 - 1.31]  |
| GSE14814        | Lung cancer        | NSCLC                   | Overall Survival                 | JRB.10                             | 90  | -           | -0.973885 | 0.846501    | 0.0620714   | 1.06 [0.57 - 1.99]  |
| GSE14814        | Lung cancer        | NSCLC                   | Disease Specific Survival        | JRB.10                             | 90  | -           | 0.748914  | 0.654564    | 0.161335    | 1.18 [0.58 - 2.38]  |
| GSE14814        | Lung cancer        | NSCLC                   | Overall Survival                 | JRB.10                             | 90  | 0.130078    | -0.993477 | 0.138763    | -1.80607    | 0.16 [0.02 - 1.80]  |
| GSE14814        | Lung cancer        | NSCLC                   | Disease Specific Survival        | JRB.10                             | 90  | -           | -0.744765 | 0.579293    | -0.758669   | 0.47 [0.03 - 6.84]  |
| GSE4716-GPL3696 | Lung cancer        | NSCLC                   | Overall Survival                 | Nagoya (1995-1996)                 | 50  | -           | 1.04649   | 0.645203    | 0.180444    | 1.20 [0.56 - 2.58]  |
| GSE8894         | Lung cancer        | NSCLC                   | Relapse Free Survival            | Seoul (1995-2005)                  | 138 | 0.22671     | -0.591484 | 0.124821    | -0.140809   | 0.87 [0.73 - 1.04]  |
| GSE8894         | Lung cancer        | NSCLC                   | Relapse Free Survival            | Seoul (1995-2005)                  | 138 | 0.063268    | -0.871131 | 0.282915    | -0.395141   | 0.67 [0.33 - 1.39]  |
| GSE4573         | Lung cancer        | Squamous cell carcinoma | Overall Survival                 | Michigan (1991-2002)               | 129 | -           | -0.621606 | 0.435334    | -0.173957   | 0.84 [0.54 - 1.30]  |
| GSE4573         | Lung cancer        | Squamous cell carcinoma | Overall Survival                 | Michigan (1991-2002)               | 129 | -           | -0.427289 | 0.681739    | -0.117783   | 0.89 [0.51 - 1.56]  |
| GSE17710        | Lung cancer        | Squamous cell carcinoma | Overall Survival                 | UNC                                | 56  | 0.386106    | 0.870721  | 0.31722     | 0.211889    | 1.24 [0.82 - 1.87]  |
| GSE17710        | Lung cancer        | Squamous cell carcinoma | Relapse Free Survival            | UNC                                | 56  | -           | 0.614579  | 0.447699    | 0.257882    | 1.29 [0.67 - 2.52]  |
| GSE17710        | Lung cancer        | Squamous cell carcinoma | Relapse Free Survival            | UNC                                | 56  | 0.186888    | 0.863808  | 0.0785243   | 0.351716    | 1.42 [0.96 - 2.10]  |
| GSE17710        | Lung cancer        | Squamous cell carcinoma | Overall Survival                 | UNC                                | 56  | -           | 0.575813  | 0.643379    | 0.163709    | 1.18 [0.59 - 2.36]  |
| GSE17710        | Lung cancer        | Squamous cell carcinoma | Relapse Free Survival            | UNC                                | 56  | 0.215829    | 0.951698  | 0.153204    | 0.289062    | 1.34 [0.90 - 1.99]  |
| GSE17710        | Lung cancer        | Squamous cell carcinoma | Overall Survival                 | UNC                                | 56  | 0.381392    | 0.769709  | 0.166865    | 0.30022     | 1.35 [0.88 - 2.07]  |
| GSE9891         | Ovarian cancer     |                         | Overall Survival                 | AOCS, RBH, WH, NKL-AVL (1992-2006) | 278 | -           | 0.423163  | 0.528535    | -0.171583   | 0.84 [0.49 - 1.44]  |
| GSE9891         | Ovarian cancer     |                         | Overall Survival                 | AOCS, RBH, WH, NKL-AVL (1992-2006) | 278 | -           | 0.315532  | 0.522985    | 0.042694    | 1.04 [0.92 - 1.19]  |
| DUKE-OC         | Ovarian cancer     |                         | Overall Survival                 | Duke                               | 133 | 0.337722    | 0.734462  | 0.663045    | -0.0386303  | 0.96 [0.81 - 1.14]  |
| DUKE-OC         | Ovarian cancer     |                         | Overall Survival                 | Duke                               | 133 | 0.0729159   | 0.737623  | 0.283062    | 0.496944    | 1.64 [0.66 - 4.07]  |
| GSE8841         | Ovarian cancer     |                         | Overall Survival                 | Milan (1992-2003)                  | 81  | 0.262581    | 1.30847   | 0.0797566   | 0.926363    | 2.53 [0.90 - 7.12]  |
| GSE26712        | Ovarian cancer     |                         | Disease Free Survival            | MSKCC (1990-2003)                  | 185 | 0.147076    | -0.577698 | 0.388562    | -0.324856   | 0.72 [0.35 - 1.51]  |
| GSE26712        | Ovarian cancer     |                         | Disease Free Survival            | MSKCC (1990-2003)                  | 185 | -           | -0.30685  | 0.567359    | -0.0556662  | 0.95 [0.78 - 1.14]  |
| GSE26712        | Ovarian cancer     |                         | Overall Survival                 | MSKCC (1990-2003)                  | 185 | -           | 0.459293  | 0.951766    | -0.00616612 | 0.99 [0.81 - 1.21]  |
| GSE26712        | Ovarian cancer     |                         | Overall Survival                 | MSKCC (1990-2003)                  | 185 | -           | -0.339689 | 0.28772     | -0.465104   | 0.63 [0.27 - 1.48]  |
| GSE17260        | Ovarian cancer     |                         | Progression Free Survival        | Niigata (1997-2008)                | 110 | 0.00579449  | -1.01623  | 0.168161    | -0.152591   | 0.86 [0.69 - 1.07]  |
| GSE17260        | Ovarian cancer     |                         | Overall Survival                 | Niigata (1997-2008)                | 110 | 0.0517887   | -0.882568 | 0.183924    | -0.201313   | 0.82 [0.61 - 1.10]  |
| GSE17260        | Ovarian cancer     |                         | Overall Survival                 | Niigata (1997-2008)                | 110 | 0.0626942   | -0.946651 | 0.181943    | -0.204744   | 0.81 [0.60 - 1.10]  |
| GSE17260        | Ovarian cancer     |                         | Progression Free Survival        | Niigata (1997-2008)                | 110 | 0.00369769  | -0.872029 | 0.0820984   | -0.198502   | 0.82 [0.66 - 1.03]  |
| GSE14764        | Ovarian cancer     |                         | Overall Survival                 | TOC                                | 80  | -           | 0.732848  | 0.344974    | 0.306199    | 1.36 [0.72 - 2.56]  |
| GSE14764        | Ovarian cancer     |                         | Overall Survival                 | TOC                                | 80  | -           | -0.861283 | 0.423531    | -0.146981   | 0.86 [0.60 - 1.24]  |
| GSE19234        | Skin cancer        | Melanoma                | Overall Survival                 | NYU                                | 38  | 0.220741    | -1.07611  | 0.0383605   | -0.522893   | 0.59 [0.36 - 0.97]  |
| GSE19234        | Skin cancer        | Melanoma                | Overall Survival                 | NYU                                | 38  | -           | -1.37226  | 0.609644    | -0.153119   | 0.86 [0.48 - 1.54]  |
| GSE30929        | Soft tissue cancer | Liposarcoma             | Distant Recurrence Free Survival | MSKCC (1993-2008)                  | 140 | 0.0435859   | -1.01188  | 0.857574    | 0.0442297   | 1.05 [0.64 - 1.69]  |
| GSE30929        | Soft tissue cancer | Liposarcoma             | Distant Recurrence Free Survival | MSKCC (1993-2008)                  | 140 | 0.205514    | -0.701146 | 0.665412    | 0.45687     | 1.58 [0.20 - 12.52] |

Supplementary Table 2. The correlations between TOX and immune infiltration levels in different cancer types.

| cancer       | variable       | partial.cor  | p           |
|--------------|----------------|--------------|-------------|
| ACC          | Purity         | -0.290882042 | 0.011927411 |
| ACC          | B Cell         | 0.246443994  | 0.035569818 |
| ACC          | CD8+ T Cell    | 0.280626719  | 0.016179968 |
| ACC          | CD4+ T Cell    | 0.12219141   | 0.303080521 |
| ACC          | Macrophage     | 0.276443604  | 0.017908432 |
| ACC          | Neutrophil     | 0.166506938  | 0.159151399 |
| ACC          | Dendritic Cell | 0.289584583  | 0.012955072 |
| BLCA         | Purity         | -0.388781488 | 9.20E-15    |
| BLCA         | B Cell         | 0.163839236  | 0.001736314 |
| BLCA         | CD8+ T Cell    | 0.149587964  | 0.004128777 |
| BLCA         | CD4+ T Cell    | 0.3217785    | 3.08E-10    |
| BLCA         | Macrophage     | 0.128450033  | 0.014057205 |
| BLCA         | Neutrophil     | 0.378254132  | 8.60E-14    |
| BLCA         | Dendritic Cell | 0.310092135  | 1.41E-09    |
| BRCA         | Purity         | -0.512089465 | 1.30E-67    |
| BRCA         | B Cell         | 0.434571095  | 2.84E-46    |
| BRCA         | CD8+ T Cell    | 0.537524938  | 3.60E-74    |
| BRCA         | CD4+ T Cell    | 0.533792625  | 5.86E-72    |
| BRCA         | Macrophage     | 0.093855385  | 0.003225462 |
| BRCA         | Neutrophil     | 0.49581328   | 3.76E-60    |
| BRCA         | Dendritic Cell | 0.571131718  | 1.98E-83    |
| BRCA-Basal   | Purity         | -0.423684968 | 5.64E-07    |
| BRCA-Basal   | B Cell         | 0.376095188  | 1.67E-05    |
| BRCA-Basal   | CD8+ T Cell    | 0.365413448  | 3.24E-05    |
| BRCA-Basal   | CD4+ T Cell    | 0.410989236  | 2.57E-06    |
| BRCA-Basal   | Macrophage     | -0.00835129  | 0.925756329 |
| BRCA-Basal   | Neutrophil     | 0.246756188  | 0.009356318 |
| BRCA-Basal   | Dendritic Cell | 0.427106304  | 2.15E-06    |
| BRCA-Her2    | Purity         | -0.543743014 | 8.56E-06    |
| BRCA-Her2    | B Cell         | 0.343925727  | 0.008207482 |
| BRCA-Her2    | CD8+ T Cell    | 0.682190332  | 5.11E-09    |
| BRCA-Her2    | CD4+ T Cell    | 0.588820969  | 1.16E-06    |
| BRCA-Her2    | Macrophage     | -0.004158393 | 0.975285415 |
| BRCA-Her2    | Neutrophil     | 0.556431253  | 5.75E-06    |
| BRCA-Her2    | Dendritic Cell | 0.604739356  | 7.97E-07    |
| BRCA-Luminal | Purity         | -0.52902585  | 1.06E-40    |
| BRCA-Luminal | B Cell         | 0.420769652  | 1.26E-24    |
| BRCA-Luminal | CD8+ T Cell    | 0.645073908  | 1.65E-64    |
| BRCA-Luminal | CD4+ T Cell    | 0.562201997  | 5.42E-46    |
| BRCA-Luminal | Macrophage     | 0.211994741  | 6.33E-07    |
| BRCA-Luminal | Neutrophil     | 0.501175725  | 2.64E-35    |
| BRCA-Luminal | Dendritic Cell | 0.567959279  | 5.09E-47    |
| CESC         | Purity         | -0.2804119   | 2.03E-06    |
| CESC         | B Cell         | 0.228329844  | 0.000126206 |
| CESC         | CD8+ T Cell    | 0.450428849  | 4.28E-15    |
| CESC         | CD4+ T Cell    | 0.226369367  | 0.000144729 |
| CESC         | Macrophage     | 0.170540246  | 0.004421647 |
| CESC         | Neutrophil     | 0.356325482  | 1.03E-09    |
| CESC         | Dendritic Cell | 0.356071115  | 1.13E-09    |
| CHOL         | Purity         | -0.119850673 | 0.486277561 |
| CHOL         | B Cell         | 0.438017092  | 0.008496026 |
| CHOL         | CD8+ T Cell    | 0.358437429  | 0.034484824 |
| CHOL         | CD4+ T Cell    | 0.344634436  | 0.042619057 |
| CHOL         | Macrophage     | 0.475554049  | 0.003886602 |

|             |                |              |             |
|-------------|----------------|--------------|-------------|
| CHOL        | Neutrophil     | 0.309152237  | 0.070745983 |
| CHOL        | Dendritic Cell | 0.485853671  | 0.003087657 |
| COAD        | Purity         | -0.267608843 | 4.19E-08    |
| COAD        | B Cell         | 0.210181327  | 2.05E-05    |
| COAD        | CD8+ T Cell    | 0.224893202  | 4.73E-06    |
| COAD        | CD4+ T Cell    | 0.061966553  | 0.21506846  |
| COAD        | Macrophage     | 0.053767155  | 0.280972211 |
| COAD        | Neutrophil     | 0.096069522  | 0.054576399 |
| COAD        | Dendritic Cell | 0.207419744  | 2.77E-05    |
| DLBC        | Purity         | 0.010456775  | 0.947597369 |
| DLBC        | B Cell         | 0.320385077  | 0.194911901 |
| DLBC        | CD8+ T Cell    | -0.111284649 | 0.631057032 |
| DLBC        | CD4+ T Cell    | 0.017802949  | 0.938946981 |
| DLBC        | Macrophage     | 0.263132382  | 0.249140464 |
| DLBC        | Neutrophil     | -0.168150145 | 0.466252779 |
| DLBC        | Dendritic Cell | 0.007741732  | 0.97343135  |
| ESCA        | Purity         | -0.188852622 | 0.010893309 |
| ESCA        | B Cell         | 0.253965178  | 0.00060261  |
| ESCA        | CD8+ T Cell    | 0.055476683  | 0.459492748 |
| ESCA        | CD4+ T Cell    | 0.283782995  | 0.000118309 |
| ESCA        | Macrophage     | 0.262240009  | 0.000376184 |
| ESCA        | Neutrophil     | 0.173451097  | 0.019882562 |
| ESCA        | Dendritic Cell | 0.190538759  | 0.010405566 |
| GBM         | Purity         | 0.076193116  | 0.119413675 |
| GBM         | B Cell         | 0.060381995  | 0.21797138  |
| GBM         | CD8+ T Cell    | 0.092345129  | 0.059243855 |
| GBM         | CD4+ T Cell    | 0.094873218  | 0.052592373 |
| GBM         | Macrophage     | 0.142873695  | 0.003418704 |
| GBM         | Neutrophil     | 0.156007514  | 0.001375983 |
| GBM         | Dendritic Cell | -0.111521527 | 0.022586774 |
| HNSC        | Purity         | -0.249495775 | 1.97E-08    |
| HNSC        | B Cell         | 0.269911998  | 2.17E-09    |
| HNSC        | CD8+ T Cell    | 0.284947945  | 2.64E-10    |
| HNSC        | CD4+ T Cell    | 0.391232062  | 5.26E-19    |
| HNSC        | Macrophage     | 0.381199052  | 3.75E-18    |
| HNSC        | Neutrophil     | 0.404597579  | 2.72E-20    |
| HNSC        | Dendritic Cell | 0.473641907  | 2.54E-28    |
| HNSC-HPVpos | Purity         | -0.37564447  | 0.000263844 |
| HNSC-HPVpos | B Cell         | 0.414026788  | 0.000148841 |
| HNSC-HPVpos | CD8+ T Cell    | 0.403713406  | 0.000247102 |
| HNSC-HPVpos | CD4+ T Cell    | 0.430879078  | 5.32E-05    |
| HNSC-HPVpos | Macrophage     | 0.535312295  | 1.09E-07    |
| HNSC-HPVpos | Neutrophil     | 0.487616444  | 2.21E-06    |
| HNSC-HPVpos | Dendritic Cell | 0.581123382  | 8.41E-09    |
| HNSC-HPVneg | Purity         | -0.227477206 | 4.20E-06    |
| HNSC-HPVneg | B Cell         | 0.25108802   | 4.44E-07    |
| HNSC-HPVneg | CD8+ T Cell    | 0.263492089  | 1.15E-07    |
| HNSC-HPVneg | CD4+ T Cell    | 0.388619506  | 1.09E-15    |
| HNSC-HPVneg | Macrophage     | 0.34252826   | 2.75E-12    |
| HNSC-HPVneg | Neutrophil     | 0.387653898  | 1.81E-15    |
| HNSC-HPVneg | Dendritic Cell | 0.458183357  | 6.01E-22    |
| KICH        | Purity         | -0.390222804 | 0.001199243 |
| KICH        | B Cell         | 0.284556917  | 0.021597443 |
| KICH        | CD8+ T Cell    | -0.024987041 | 0.84337842  |
| KICH        | CD4+ T Cell    | 0.078364294  | 0.534935476 |
| KICH        | Macrophage     | -0.017457266 | 0.890221019 |

|      |                |              |             |
|------|----------------|--------------|-------------|
| KICH | Neutrophil     | 0.163542172  | 0.193012254 |
| KICH | Dendritic Cell | 0.320763089  | 0.009184029 |
| KIRC | Purity         | -0.270532022 | 3.43E-09    |
| KIRC | B Cell         | 0.482873384  | 3.46E-28    |
| KIRC | CD8+ T Cell    | 0.620848815  | 4.92E-48    |
| KIRC | CD4+ T Cell    | 0.196098326  | 2.28E-05    |
| KIRC | Macrophage     | 0.243254869  | 1.86E-07    |
| KIRC | Neutrophil     | 0.422448362  | 3.00E-21    |
| KIRC | Dendritic Cell | 0.578019422  | 6.47E-42    |
| KIRP | Purity         | -0.133055187 | 0.03231526  |
| KIRP | B Cell         | 0.372514535  | 7.56E-10    |
| KIRP | CD8+ T Cell    | 0.323133448  | 1.11E-07    |
| KIRP | CD4+ T Cell    | 0.157568707  | 0.011261093 |
| KIRP | Macrophage     | 0.050623194  | 0.426432514 |
| KIRP | Neutrophil     | 0.209214853  | 0.000720464 |
| KIRP | Dendritic Cell | 0.233622297  | 0.000161949 |
| LGG  | Purity         | 0.263556135  | 4.71E-09    |
| LGG  | B Cell         | -0.228440841 | 4.46E-07    |
| LGG  | CD8+ T Cell    | -0.174247607 | 0.000128681 |
| LGG  | CD4+ T Cell    | -0.183306346 | 5.75E-05    |
| LGG  | Macrophage     | -0.27468609  | 1.24E-09    |
| LGG  | Neutrophil     | -0.279778375 | 5.44E-10    |
| LGG  | Dendritic Cell | -0.236718389 | 1.74E-07    |
| LIHC | Purity         | -0.440307653 | 7.69E-18    |
| LIHC | B Cell         | 0.352910388  | 1.59E-11    |
| LIHC | CD8+ T Cell    | 0.456262943  | 5.48E-19    |
| LIHC | CD4+ T Cell    | 0.139616139  | 0.00952039  |
| LIHC | Macrophage     | 0.273216995  | 2.98E-07    |
| LIHC | Neutrophil     | 0.28246016   | 9.48E-08    |
| LIHC | Dendritic Cell | 0.420897536  | 4.97E-16    |
| LUAD | Purity         | -0.046099361 | 0.306517094 |
| LUAD | B Cell         | 0.325670236  | 2.02E-13    |
| LUAD | CD8+ T Cell    | 0.225450899  | 4.97E-07    |
| LUAD | CD4+ T Cell    | 0.202462123  | 7.15E-06    |
| LUAD | Macrophage     | 0.132025951  | 0.003581719 |
| LUAD | Neutrophil     | 0.083772335  | 0.065834232 |
| LUAD | Dendritic Cell | 0.22342354   | 6.16E-07    |
| LUSC | Purity         | -0.21015379  | 3.58E-06    |
| LUSC | B Cell         | 0.400900639  | 1.19E-19    |
| LUSC | CD8+ T Cell    | 0.408295988  | 1.65E-20    |
| LUSC | CD4+ T Cell    | 0.282954149  | 3.40E-10    |
| LUSC | Macrophage     | 0.273840047  | 1.19E-09    |
| LUSC | Neutrophil     | 0.278880278  | 5.95E-10    |
| LUSC | Dendritic Cell | 0.421235244  | 8.24E-22    |
| MESO | Purity         | -0.228565511 | 0.034283685 |
| MESO | B Cell         | 0.519300173  | 4.16E-07    |
| MESO | CD8+ T Cell    | 0.195631675  | 0.074520704 |
| MESO | CD4+ T Cell    | 0.307698918  | 0.004409499 |
| MESO | Macrophage     | -0.043369974 | 0.695264513 |
| MESO | Neutrophil     | 0.004872051  | 0.964916953 |
| MESO | Dendritic Cell | 0.700798027  | 1.16E-13    |
| OV   | Purity         | 0.187474421  | 3.32E-05    |
| OV   | B Cell         | -0.117673329 | 0.00987025  |
| OV   | CD8+ T Cell    | 0.021470263  | 0.638914143 |
| OV   | CD4+ T Cell    | -0.060024439 | 0.189242007 |
| OV   | Macrophage     | -0.128916591 | 0.004671266 |

|                 |                |              |             |
|-----------------|----------------|--------------|-------------|
| OV              | Neutrophil     | -0.144304563 | 0.001524819 |
| OV              | Dendritic Cell | -0.060490714 | 0.185821567 |
| PAAD            | Purity         | 0.028608347  | 0.709494291 |
| PAAD            | B Cell         | 0.285021974  | 0.000157783 |
| PAAD            | CD8+ T Cell    | 0.291370305  | 0.000110432 |
| PAAD            | CD4+ T Cell    | 0.21350778   | 0.005316328 |
| PAAD            | Macrophage     | 0.335735512  | 7.15E-06    |
| PAAD            | Neutrophil     | 0.180899987  | 0.017894552 |
| PAAD            | Dendritic Cell | 0.234008789  | 0.0020665   |
| PCPG            | Purity         | 0.016402295  | 0.832867794 |
| PCPG            | B Cell         | 0.15058622   | 0.052079282 |
| PCPG            | CD8+ T Cell    | 0.038674968  | 0.619737404 |
| PCPG            | CD4+ T Cell    | 0.161327923  | 0.037267567 |
| PCPG            | Macrophage     | 0.170741517  | 0.027849208 |
| PCPG            | Neutrophil     | 0.057453313  | 0.460822395 |
| PCPG            | Dendritic Cell | 0.305757313  | 5.86E-05    |
| PRAD            | Purity         | -0.243114702 | 5.03E-07    |
| PRAD            | B Cell         | 0.312383703  | 8.91E-11    |
| PRAD            | CD8+ T Cell    | 0.186215009  | 0.000133402 |
| PRAD            | CD4+ T Cell    | 0.217106388  | 8.95E-06    |
| PRAD            | Macrophage     | 0.171418405  | 0.000445132 |
| PRAD            | Neutrophil     | 0.251927591  | 2.05E-07    |
| PRAD            | Dendritic Cell | 0.253906368  | 1.58E-07    |
| READ            | Purity         | -0.183049433 | 0.030404739 |
| READ            | B Cell         | 0.238667637  | 0.004662829 |
| READ            | CD8+ T Cell    | 0.223437415  | 0.008192921 |
| READ            | CD4+ T Cell    | -0.024224421 | 0.77712762  |
| READ            | Macrophage     | -0.058304693 | 0.495381171 |
| READ            | Neutrophil     | -0.043662432 | 0.611106538 |
| READ            | Dendritic Cell | 0.246642536  | 0.0034228   |
| SARC            | Purity         | -0.112414199 | 0.079065775 |
| SARC            | B Cell         | 0.377312677  | 1.67E-09    |
| SARC            | CD8+ T Cell    | 0.132313059  | 0.040550526 |
| SARC            | CD4+ T Cell    | 0.069820932  | 0.282348362 |
| SARC            | Macrophage     | -0.105475659 | 0.106789838 |
| SARC            | Neutrophil     | -0.013610014 | 0.833171572 |
| SARC            | Dendritic Cell | 0.138363745  | 0.031781071 |
| SKCM            | Purity         | -0.498123906 | 4.29E-30    |
| SKCM            | B Cell         | 0.289247994  | 4.40E-10    |
| SKCM            | CD8+ T Cell    | 0.503267934  | 1.68E-29    |
| SKCM            | CD4+ T Cell    | 0.384835127  | 3.42E-17    |
| SKCM            | Macrophage     | 0.31341058   | 8.80E-12    |
| SKCM            | Neutrophil     | 0.498745286  | 8.44E-30    |
| SKCM            | Dendritic Cell | 0.499622837  | 1.54E-29    |
| SKCM-Primary    | Purity         | -0.442082916 | 2.94E-06    |
| SKCM-Primary    | B Cell         | 0.090264101  | 0.369353081 |
| SKCM-Primary    | CD8+ T Cell    | 0.407923429  | 2.29E-05    |
| SKCM-Primary    | CD4+ T Cell    | 0.390204389  | 5.49E-05    |
| SKCM-Primary    | Macrophage     | 0.117352631  | 0.24250732  |
| SKCM-Primary    | Neutrophil     | 0.267631289  | 0.007103388 |
| SKCM-Primary    | Dendritic Cell | 0.275880829  | 0.005230789 |
| SKCM-Metastasis | Purity         | -0.528039879 | 7.02E-27    |
| SKCM-Metastasis | B Cell         | 0.283044374  | 8.52E-08    |
| SKCM-Metastasis | CD8+ T Cell    | 0.478726521  | 1.19E-20    |
| SKCM-Metastasis | CD4+ T Cell    | 0.326183435  | 5.71E-10    |
| SKCM-Metastasis | Macrophage     | 0.266750553  | 3.94E-07    |

|                 |                |              |             |
|-----------------|----------------|--------------|-------------|
| SKCM-Metastasis | Neutrophil     | 0.49766503   | 2.31E-23    |
| SKCM-Metastasis | Dendritic Cell | 0.505555345  | 1.02E-23    |
| STAD            | Purity         | -0.118839836 | 0.020492837 |
| STAD            | B Cell         | 0.298542393  | 4.94E-09    |
| STAD            | CD8+ T Cell    | 0.169357676  | 0.001074367 |
| STAD            | CD4+ T Cell    | 0.425809021  | 1.49E-17    |
| STAD            | Macrophage     | 0.3535631    | 2.46E-12    |
| STAD            | Neutrophil     | 0.120489218  | 0.020264296 |
| STAD            | Dendritic Cell | 0.268506954  | 1.51E-07    |
| TGCT            | Purity         | -0.095775904 | 0.246884899 |
| TGCT            | B Cell         | 0.294394912  | 0.000295257 |
| TGCT            | CD8+ T Cell    | 0.204183803  | 0.013114121 |
| TGCT            | CD4+ T Cell    | 0.262005665  | 0.00140019  |
| TGCT            | Macrophage     | 0.220049363  | 0.007404351 |
| TGCT            | Neutrophil     | 0.256845275  | 0.001687435 |
| TGCT            | Dendritic Cell | 0.169236064  | 0.041145151 |
| THCA            | Purity         | -0.070525522 | 0.119350941 |
| THCA            | B Cell         | 0.238326319  | 1.19E-07    |
| THCA            | CD8+ T Cell    | 0.447100053  | 2.62E-25    |
| THCA            | CD4+ T Cell    | 0.211072272  | 2.55E-06    |
| THCA            | Macrophage     | 0.291445057  | 5.21E-11    |
| THCA            | Neutrophil     | 0.506290519  | 3.95E-33    |
| THCA            | Dendritic Cell | 0.559927843  | 2.27E-41    |
| THYM            | Purity         | -0.116666327 | 0.212327538 |
| THYM            | B Cell         | 0.734431417  | 1.43E-20    |
| THYM            | CD8+ T Cell    | 0.60831737   | 7.03E-13    |
| THYM            | CD4+ T Cell    | 0.806638501  | 1.20E-26    |
| THYM            | Macrophage     | 0.525574751  | 1.92E-09    |
| THYM            | Neutrophil     | -0.107501621 | 0.25492996  |
| THYM            | Dendritic Cell | 0.897528091  | 1.24E-41    |
| UCEC            | Purity         | -0.181631028 | 0.001765357 |
| UCEC            | B Cell         | 0.210200056  | 0.000320432 |
| UCEC            | CD8+ T Cell    | 0.128495634  | 0.028960756 |
| UCEC            | CD4+ T Cell    | 0.195489682  | 0.000799816 |
| UCEC            | Macrophage     | 0.248739472  | 1.71E-05    |
| UCEC            | Neutrophil     | 0.136656273  | 0.019275047 |
| UCEC            | Dendritic Cell | 0.150888504  | 0.009819414 |
| UCS             | Purity         | -0.024063764 | 0.862872223 |
| UCS             | B Cell         | 0.147556285  | 0.291701737 |
| UCS             | CD8+ T Cell    | 0.087264421  | 0.534380617 |
| UCS             | CD4+ T Cell    | 0.145551551  | 0.29837952  |
| UCS             | Macrophage     | -0.029947936 | 0.831425939 |
| UCS             | Neutrophil     | 0.203167504  | 0.144543402 |
| UCS             | Dendritic Cell | 0.143048282  | 0.306855876 |
| UVM             | Purity         | 0.16890095   | 0.139340231 |
| UVM             | B Cell         | -0.22079624  | 0.05696217  |
| UVM             | CD8+ T Cell    | 0.155955759  | 0.175600447 |
| UVM             | CD4+ T Cell    | 0.085826824  | 0.461011506 |
| UVM             | Macrophage     | 0.224813957  | 0.074098711 |
| UVM             | Neutrophil     | 0.012271445  | 0.915642514 |
| UVM             | Dendritic Cell | -0.018267355 | 0.877231838 |

---



Supplementary Table 3. The detailed SCNA (somatic copy number alterations) analysis of TOX for various cancers.

| cancer | variable       | cna_level          | p           |
|--------|----------------|--------------------|-------------|
| ACC    | B Cell         | Arm-level Deletion | 0.317467885 |
| ACC    | B Cell         | Diploid/Normal     | 1           |
| ACC    | B Cell         | Arm-level Gain     | 0.25620585  |
| ACC    | CD8+ T Cell    | Arm-level Deletion | 0.022628271 |
| ACC    | CD8+ T Cell    | Diploid/Normal     | 1           |
| ACC    | CD8+ T Cell    | Arm-level Gain     | 0.150142937 |
| ACC    | CD4+ T Cell    | Arm-level Deletion | 0.691024701 |
| ACC    | CD4+ T Cell    | Diploid/Normal     | 1           |
| ACC    | CD4+ T Cell    | Arm-level Gain     | 0.531647595 |
| ACC    | Macrophage     | Arm-level Deletion | 0.027403288 |
| ACC    | Macrophage     | Diploid/Normal     | 1           |
| ACC    | Macrophage     | Arm-level Gain     | 0.362707983 |
| ACC    | Neutrophil     | Arm-level Deletion | 0.039044481 |
| ACC    | Neutrophil     | Diploid/Normal     | 1           |
| ACC    | Neutrophil     | Arm-level Gain     | 0.143993681 |
| ACC    | Dendritic Cell | Arm-level Deletion | 0.016726061 |
| ACC    | Dendritic Cell | Diploid/Normal     | 1           |
| ACC    | Dendritic Cell | Arm-level Gain     | 0.060800445 |
| BLCA   | B Cell         | Deep Deletion      | 0.444192645 |
| BLCA   | B Cell         | Arm-level Deletion | 0.021686487 |
| BLCA   | B Cell         | Diploid/Normal     | 1           |
| BLCA   | B Cell         | Arm-level Gain     | 0.306140006 |
| BLCA   | B Cell         | High Amplification | 0.630679678 |
| BLCA   | CD8+ T Cell    | Deep Deletion      | 0.294178078 |
| BLCA   | CD8+ T Cell    | Arm-level Deletion | 0.163164434 |
| BLCA   | CD8+ T Cell    | Diploid/Normal     | 1           |
| BLCA   | CD8+ T Cell    | Arm-level Gain     | 0.834158379 |
| BLCA   | CD8+ T Cell    | High Amplification | 0.254954877 |
| BLCA   | CD4+ T Cell    | Deep Deletion      | 0.179635444 |
| BLCA   | CD4+ T Cell    | Arm-level Deletion | 0.653026117 |
| BLCA   | CD4+ T Cell    | Diploid/Normal     | 1           |
| BLCA   | CD4+ T Cell    | Arm-level Gain     | 0.101766056 |
| BLCA   | CD4+ T Cell    | High Amplification | 0.542792954 |
| BLCA   | Macrophage     | Deep Deletion      | 0.920702909 |
| BLCA   | Macrophage     | Arm-level Deletion | 0.212787276 |
| BLCA   | Macrophage     | Diploid/Normal     | 1           |
| BLCA   | Macrophage     | Arm-level Gain     | 0.744384801 |
| BLCA   | Macrophage     | High Amplification | 0.215235112 |
| BLCA   | Neutrophil     | Deep Deletion      | 0.007969667 |
| BLCA   | Neutrophil     | Arm-level Deletion | 0.510409206 |
| BLCA   | Neutrophil     | Diploid/Normal     | 1           |
| BLCA   | Neutrophil     | Arm-level Gain     | 0.282446331 |
| BLCA   | Neutrophil     | High Amplification | 0.576396035 |
| BLCA   | Dendritic Cell | Deep Deletion      | 0.075818012 |
| BLCA   | Dendritic Cell | Arm-level Deletion | 0.686958816 |
| BLCA   | Dendritic Cell | Diploid/Normal     | 1           |
| BLCA   | Dendritic Cell | Arm-level Gain     | 0.354627526 |
| BLCA   | Dendritic Cell | High Amplification | 0.678185441 |
| BRCA   | B Cell         | Deep Deletion      | 1           |
| BRCA   | B Cell         | Arm-level Deletion | 0.33789253  |
| BRCA   | B Cell         | Diploid/Normal     | 1           |
| BRCA   | B Cell         | Arm-level Gain     | 0.363551684 |
| BRCA   | B Cell         | High Amplification | 0.14792963  |
| BRCA   | CD8+ T Cell    | Deep Deletion      | 1           |
| BRCA   | CD8+ T Cell    | Arm-level Deletion | 0.922551944 |
| BRCA   | CD8+ T Cell    | Diploid/Normal     | 1           |

|            |                |                    |             |
|------------|----------------|--------------------|-------------|
| BRCA       | CD8+ T Cell    | Arm-level Gain     | 0.305905831 |
| BRCA       | CD8+ T Cell    | High Amplification | 0.06853451  |
| BRCA       | CD4+ T Cell    | Deep Deletion      | 1           |
| BRCA       | CD4+ T Cell    | Arm-level Deletion | 0.302137703 |
| BRCA       | CD4+ T Cell    | Diploid/Normal     | 1           |
| BRCA       | CD4+ T Cell    | Arm-level Gain     | 0.053545426 |
| BRCA       | CD4+ T Cell    | High Amplification | 0.000278395 |
| BRCA       | Macrophage     | Deep Deletion      | 1           |
| BRCA       | Macrophage     | Arm-level Deletion | 0.292974149 |
| BRCA       | Macrophage     | Diploid/Normal     | 1           |
| BRCA       | Macrophage     | Arm-level Gain     | 0.018065447 |
| BRCA       | Macrophage     | High Amplification | 0.029759762 |
| BRCA       | Neutrophil     | Deep Deletion      | 1           |
| BRCA       | Neutrophil     | Arm-level Deletion | 0.975942885 |
| BRCA       | Neutrophil     | Diploid/Normal     | 1           |
| BRCA       | Neutrophil     | Arm-level Gain     | 0.587461736 |
| BRCA       | Neutrophil     | High Amplification | 0.01775741  |
| BRCA       | Dendritic Cell | Deep Deletion      | 1           |
| BRCA       | Dendritic Cell | Arm-level Deletion | 0.681791488 |
| BRCA       | Dendritic Cell | Diploid/Normal     | 1           |
| BRCA       | Dendritic Cell | Arm-level Gain     | 0.47599111  |
| BRCA       | Dendritic Cell | High Amplification | 0.039511548 |
| BRCA-Basal | B Cell         | Arm-level Deletion | 0.08501973  |
| BRCA-Basal | B Cell         | Diploid/Normal     | 1           |
| BRCA-Basal | B Cell         | Arm-level Gain     | 0.112044998 |
| BRCA-Basal | B Cell         | High Amplification | 0.311694434 |
| BRCA-Basal | CD8+ T Cell    | Arm-level Deletion | 0.011968175 |
| BRCA-Basal | CD8+ T Cell    | Diploid/Normal     | 1           |
| BRCA-Basal | CD8+ T Cell    | Arm-level Gain     | 0.255739923 |
| BRCA-Basal | CD8+ T Cell    | High Amplification | 0.264808039 |
| BRCA-Basal | CD4+ T Cell    | Arm-level Deletion | 0.099028477 |
| BRCA-Basal | CD4+ T Cell    | Diploid/Normal     | 1           |
| BRCA-Basal | CD4+ T Cell    | Arm-level Gain     | 0.562043528 |
| BRCA-Basal | CD4+ T Cell    | High Amplification | 0.09235737  |
| BRCA-Basal | Macrophage     | Arm-level Deletion | 0.457784793 |
| BRCA-Basal | Macrophage     | Diploid/Normal     | 1           |
| BRCA-Basal | Macrophage     | Arm-level Gain     | 0.82347073  |
| BRCA-Basal | Macrophage     | High Amplification | 0.055249588 |
| BRCA-Basal | Neutrophil     | Arm-level Deletion | 0.187497032 |
| BRCA-Basal | Neutrophil     | Diploid/Normal     | 1           |
| BRCA-Basal | Neutrophil     | Arm-level Gain     | 0.691497412 |
| BRCA-Basal | Neutrophil     | High Amplification | 0.11910873  |
| BRCA-Basal | Dendritic Cell | Arm-level Deletion | 0.068117727 |
| BRCA-Basal | Dendritic Cell | Diploid/Normal     | 1           |
| BRCA-Basal | Dendritic Cell | Arm-level Gain     | 0.365199119 |
| BRCA-Basal | Dendritic Cell | High Amplification | 0.14148059  |
| BRCA-Her2  | B Cell         | Deep Deletion      | 1           |
| BRCA-Her2  | B Cell         | Arm-level Deletion | 0.580772795 |
| BRCA-Her2  | B Cell         | Diploid/Normal     | 1           |
| BRCA-Her2  | B Cell         | Arm-level Gain     | 0.375551366 |
| BRCA-Her2  | B Cell         | High Amplification | 0.618811926 |
| BRCA-Her2  | CD8+ T Cell    | Deep Deletion      | 1           |
| BRCA-Her2  | CD8+ T Cell    | Arm-level Deletion | 0.344292419 |
| BRCA-Her2  | CD8+ T Cell    | Diploid/Normal     | 1           |
| BRCA-Her2  | CD8+ T Cell    | Arm-level Gain     | 0.393555223 |
| BRCA-Her2  | CD8+ T Cell    | High Amplification | 0.679314277 |
| BRCA-Her2  | CD4+ T Cell    | Deep Deletion      | 1           |
| BRCA-Her2  | CD4+ T Cell    | Arm-level Deletion | 0.848344344 |

|              |                |                    |             |
|--------------|----------------|--------------------|-------------|
| BRCA-Her2    | CD4+ T Cell    | Diploid/Normal     | 1           |
| BRCA-Her2    | CD4+ T Cell    | Arm-level Gain     | 0.864621341 |
| BRCA-Her2    | CD4+ T Cell    | High Amplification | 0.804495553 |
| BRCA-Her2    | Macrophage     | Deep Deletion      | 1           |
| BRCA-Her2    | Macrophage     | Arm-level Deletion | 0.192320083 |
| BRCA-Her2    | Macrophage     | Diploid/Normal     | 1           |
| BRCA-Her2    | Macrophage     | Arm-level Gain     | 0.079369861 |
| BRCA-Her2    | Macrophage     | High Amplification | 0.674213933 |
| BRCA-Her2    | Neutrophil     | Deep Deletion      | 1           |
| BRCA-Her2    | Neutrophil     | Arm-level Deletion | 0.867753707 |
| BRCA-Her2    | Neutrophil     | Diploid/Normal     | 1           |
| BRCA-Her2    | Neutrophil     | Arm-level Gain     | 0.926711032 |
| BRCA-Her2    | Neutrophil     | High Amplification | 0.985877254 |
| BRCA-Her2    | Dendritic Cell | Deep Deletion      | 1           |
| BRCA-Her2    | Dendritic Cell | Arm-level Deletion | 0.819750747 |
| BRCA-Her2    | Dendritic Cell | Diploid/Normal     | 1           |
| BRCA-Her2    | Dendritic Cell | Arm-level Gain     | 0.451359402 |
| BRCA-Her2    | Dendritic Cell | High Amplification | 0.914010631 |
| BRCA-Luminal | B Cell         | Arm-level Deletion | 0.528174928 |
| BRCA-Luminal | B Cell         | Diploid/Normal     | 1           |
| BRCA-Luminal | B Cell         | Arm-level Gain     | 0.37065885  |
| BRCA-Luminal | B Cell         | High Amplification | 0.043434506 |
| BRCA-Luminal | CD8+ T Cell    | Arm-level Deletion | 0.287064757 |
| BRCA-Luminal | CD8+ T Cell    | Diploid/Normal     | 1           |
| BRCA-Luminal | CD8+ T Cell    | Arm-level Gain     | 0.415521697 |
| BRCA-Luminal | CD8+ T Cell    | High Amplification | 0.008054574 |
| BRCA-Luminal | CD4+ T Cell    | Arm-level Deletion | 0.947696126 |
| BRCA-Luminal | CD4+ T Cell    | Diploid/Normal     | 1           |
| BRCA-Luminal | CD4+ T Cell    | Arm-level Gain     | 0.070163051 |
| BRCA-Luminal | CD4+ T Cell    | High Amplification | 9.73E-05    |
| BRCA-Luminal | Macrophage     | Arm-level Deletion | 0.242485494 |
| BRCA-Luminal | Macrophage     | Diploid/Normal     | 1           |
| BRCA-Luminal | Macrophage     | Arm-level Gain     | 0.060857064 |
| BRCA-Luminal | Macrophage     | High Amplification | 0.288331141 |
| BRCA-Luminal | Neutrophil     | Arm-level Deletion | 0.45678677  |
| BRCA-Luminal | Neutrophil     | Diploid/Normal     | 1           |
| BRCA-Luminal | Neutrophil     | Arm-level Gain     | 0.125376965 |
| BRCA-Luminal | Neutrophil     | High Amplification | 0.004104564 |
| BRCA-Luminal | Dendritic Cell | Arm-level Deletion | 0.3946298   |
| BRCA-Luminal | Dendritic Cell | Diploid/Normal     | 1           |
| BRCA-Luminal | Dendritic Cell | Arm-level Gain     | 0.315389327 |
| BRCA-Luminal | Dendritic Cell | High Amplification | 0.011372023 |
| CECSC        | B Cell         | Arm-level Deletion | 0.15571049  |
| CECSC        | B Cell         | Diploid/Normal     | 1           |
| CECSC        | B Cell         | Arm-level Gain     | 0.311580743 |
| CECSC        | B Cell         | High Amplification | 0.704679925 |
| CECSC        | CD8+ T Cell    | Arm-level Deletion | 0.412436117 |
| CECSC        | CD8+ T Cell    | Diploid/Normal     | 1           |
| CECSC        | CD8+ T Cell    | Arm-level Gain     | 0.18537661  |
| CECSC        | CD8+ T Cell    | High Amplification | 0.626084534 |
| CECSC        | CD4+ T Cell    | Arm-level Deletion | 0.680407062 |
| CECSC        | CD4+ T Cell    | Diploid/Normal     | 1           |
| CECSC        | CD4+ T Cell    | Arm-level Gain     | 0.646220184 |
| CECSC        | CD4+ T Cell    | High Amplification | 0.448782419 |
| CECSC        | Macrophage     | Arm-level Deletion | 0.758170071 |
| CECSC        | Macrophage     | Diploid/Normal     | 1           |
| CECSC        | Macrophage     | Arm-level Gain     | 0.677632363 |
| CECSC        | Macrophage     | High Amplification | 0.521664155 |

|      |                |                    |             |
|------|----------------|--------------------|-------------|
| CESC | Neutrophil     | Arm-level Deletion | 0.809123837 |
| CESC | Neutrophil     | Diploid/Normal     | 1           |
| CESC | Neutrophil     | Arm-level Gain     | 0.802619293 |
| CESC | Neutrophil     | High Amplification | 0.798686947 |
| CESC | Dendritic Cell | Arm-level Deletion | 0.924416726 |
| CESC | Dendritic Cell | Diploid/Normal     | 1           |
| CESC | Dendritic Cell | Arm-level Gain     | 0.816697687 |
| CESC | Dendritic Cell | High Amplification | 0.685555674 |
| CHOL | B Cell         | Arm-level Deletion | 0.562233099 |
| CHOL | B Cell         | Diploid/Normal     | 1           |
| CHOL | B Cell         | Arm-level Gain     | 0.554701308 |
| CHOL | CD8+ T Cell    | Arm-level Deletion | 0.523274104 |
| CHOL | CD8+ T Cell    | Diploid/Normal     | 1           |
| CHOL | CD8+ T Cell    | Arm-level Gain     | 0.34072511  |
| CHOL | CD4+ T Cell    | Arm-level Deletion | 0.936923777 |
| CHOL | CD4+ T Cell    | Diploid/Normal     | 1           |
| CHOL | CD4+ T Cell    | Arm-level Gain     | 0.995110894 |
| CHOL | Macrophage     | Arm-level Deletion | 0.795841769 |
| CHOL | Macrophage     | Diploid/Normal     | 1           |
| CHOL | Macrophage     | Arm-level Gain     | 0.39659534  |
| CHOL | Neutrophil     | Arm-level Deletion | 0.461480613 |
| CHOL | Neutrophil     | Diploid/Normal     | 1           |
| CHOL | Neutrophil     | Arm-level Gain     | 0.039481714 |
| CHOL | Dendritic Cell | Arm-level Deletion | 0.59135491  |
| CHOL | Dendritic Cell | Diploid/Normal     | 1           |
| CHOL | Dendritic Cell | Arm-level Gain     | 0.41775693  |
| COAD | B Cell         | Arm-level Deletion | 0.047169032 |
| COAD | B Cell         | Diploid/Normal     | 1           |
| COAD | B Cell         | Arm-level Gain     | 0.000312569 |
| COAD | B Cell         | High Amplification | 0.236959117 |
| COAD | CD8+ T Cell    | Arm-level Deletion | 0.026617302 |
| COAD | CD8+ T Cell    | Diploid/Normal     | 1           |
| COAD | CD8+ T Cell    | Arm-level Gain     | 0.002340936 |
| COAD | CD8+ T Cell    | High Amplification | 0.308106146 |
| COAD | CD4+ T Cell    | Arm-level Deletion | 0.441369636 |
| COAD | CD4+ T Cell    | Diploid/Normal     | 1           |
| COAD | CD4+ T Cell    | Arm-level Gain     | 0.529715892 |
| COAD | CD4+ T Cell    | High Amplification | 0.375699691 |
| COAD | Macrophage     | Arm-level Deletion | 0.583695136 |
| COAD | Macrophage     | Diploid/Normal     | 1           |
| COAD | Macrophage     | Arm-level Gain     | 0.129638297 |
| COAD | Macrophage     | High Amplification | 0.305176627 |
| COAD | Neutrophil     | Arm-level Deletion | 0.221993705 |
| COAD | Neutrophil     | Diploid/Normal     | 1           |
| COAD | Neutrophil     | Arm-level Gain     | 0.360714101 |
| COAD | Neutrophil     | High Amplification | 0.576649472 |
| COAD | Dendritic Cell | Arm-level Deletion | 0.145226203 |
| COAD | Dendritic Cell | Diploid/Normal     | 1           |
| COAD | Dendritic Cell | Arm-level Gain     | 0.035067408 |
| COAD | Dendritic Cell | High Amplification | 0.099808093 |
| DLBC | B Cell         | Deep Deletion      | 0.125781884 |
| DLBC | B Cell         | Arm-level Deletion | 0.025051226 |
| DLBC | B Cell         | Diploid/Normal     | 1           |
| DLBC | CD8+ T Cell    | Deep Deletion      | 0.367329732 |
| DLBC | CD8+ T Cell    | Arm-level Deletion | 0.463555477 |
| DLBC | CD8+ T Cell    | Diploid/Normal     | 1           |
| DLBC | CD4+ T Cell    | Deep Deletion      | 0.594578113 |
| DLBC | CD4+ T Cell    | Arm-level Deletion | 0.855973044 |

|      |                |                    |             |
|------|----------------|--------------------|-------------|
| DLBC | CD4+ T Cell    | Diploid/Normal     | 1           |
| DLBC | Macrophage     | Deep Deletion      | 0.007975121 |
| DLBC | Macrophage     | Arm-level Deletion | 0.531851274 |
| DLBC | Macrophage     | Diploid/Normal     | 1           |
| DLBC | Neutrophil     | Deep Deletion      | 0.545886116 |
| DLBC | Neutrophil     | Arm-level Deletion | 0.693802235 |
| DLBC | Neutrophil     | Diploid/Normal     | 1           |
| DLBC | Dendritic Cell | Deep Deletion      | 0.203879642 |
| DLBC | Dendritic Cell | Arm-level Deletion | 0.468169329 |
| DLBC | Dendritic Cell | Diploid/Normal     | 1           |
| ESCA | B Cell         | Arm-level Deletion | 0.371035693 |
| ESCA | B Cell         | Diploid/Normal     | 1           |
| ESCA | B Cell         | Arm-level Gain     | 0.1618897   |
| ESCA | B Cell         | High Amplification | 0.402261238 |
| ESCA | CD8+ T Cell    | Arm-level Deletion | 0.517070358 |
| ESCA | CD8+ T Cell    | Diploid/Normal     | 1           |
| ESCA | CD8+ T Cell    | Arm-level Gain     | 0.751636104 |
| ESCA | CD8+ T Cell    | High Amplification | 0.445278909 |
| ESCA | CD4+ T Cell    | Arm-level Deletion | 0.187859346 |
| ESCA | CD4+ T Cell    | Diploid/Normal     | 1           |
| ESCA | CD4+ T Cell    | Arm-level Gain     | 0.137419904 |
| ESCA | CD4+ T Cell    | High Amplification | 0.434265522 |
| ESCA | Macrophage     | Arm-level Deletion | 0.620708337 |
| ESCA | Macrophage     | Diploid/Normal     | 1           |
| ESCA | Macrophage     | Arm-level Gain     | 0.928533426 |
| ESCA | Macrophage     | High Amplification | 0.53569308  |
| ESCA | Neutrophil     | Arm-level Deletion | 0.00868741  |
| ESCA | Neutrophil     | Diploid/Normal     | 1           |
| ESCA | Neutrophil     | Arm-level Gain     | 0.115477742 |
| ESCA | Neutrophil     | High Amplification | 0.979102305 |
| ESCA | Dendritic Cell | Arm-level Deletion | 0.013534341 |
| ESCA | Dendritic Cell | Diploid/Normal     | 1           |
| ESCA | Dendritic Cell | Arm-level Gain     | 0.010337827 |
| ESCA | Dendritic Cell | High Amplification | 0.693946952 |
| GBM  | B Cell         | Arm-level Deletion | 0.980568029 |
| GBM  | B Cell         | Diploid/Normal     | 1           |
| GBM  | B Cell         | Arm-level Gain     | 0.326898323 |
| GBM  | CD8+ T Cell    | Arm-level Deletion | 0.330259296 |
| GBM  | CD8+ T Cell    | Diploid/Normal     | 1           |
| GBM  | CD8+ T Cell    | Arm-level Gain     | 0.42245805  |
| GBM  | CD4+ T Cell    | Arm-level Deletion | 0.839398862 |
| GBM  | CD4+ T Cell    | Diploid/Normal     | 1           |
| GBM  | CD4+ T Cell    | Arm-level Gain     | 0.355302228 |
| GBM  | Macrophage     | Arm-level Deletion | 0.502320465 |
| GBM  | Macrophage     | Diploid/Normal     | 1           |
| GBM  | Macrophage     | Arm-level Gain     | 0.134774599 |
| GBM  | Neutrophil     | Arm-level Deletion | 0.853324697 |
| GBM  | Neutrophil     | Diploid/Normal     | 1           |
| GBM  | Neutrophil     | Arm-level Gain     | 0.360292876 |
| GBM  | Dendritic Cell | Arm-level Deletion | 0.380757039 |
| GBM  | Dendritic Cell | Diploid/Normal     | 1           |
| GBM  | Dendritic Cell | Arm-level Gain     | 0.085291476 |
| HNSC | B Cell         | Arm-level Deletion | 0.295152932 |
| HNSC | B Cell         | Diploid/Normal     | 1           |
| HNSC | B Cell         | Arm-level Gain     | 0.007004918 |
| HNSC | B Cell         | High Amplification | 0.00184183  |
| HNSC | CD8+ T Cell    | Arm-level Deletion | 0.005544454 |
| HNSC | CD8+ T Cell    | Diploid/Normal     | 1           |

|             |                |                    |             |
|-------------|----------------|--------------------|-------------|
| HNSC        | CD8+ T Cell    | Arm-level Gain     | 0.010013966 |
| HNSC        | CD8+ T Cell    | High Amplification | 0.000579518 |
| HNSC        | CD4+ T Cell    | Arm-level Deletion | 0.162380733 |
| HNSC        | CD4+ T Cell    | Diploid/Normal     | 1           |
| HNSC        | CD4+ T Cell    | Arm-level Gain     | 0.174125285 |
| HNSC        | CD4+ T Cell    | High Amplification | 0.209130675 |
| HNSC        | Macrophage     | Arm-level Deletion | 0.34796129  |
| HNSC        | Macrophage     | Diploid/Normal     | 1           |
| HNSC        | Macrophage     | Arm-level Gain     | 0.42121017  |
| HNSC        | Macrophage     | High Amplification | 0.310806562 |
| HNSC        | Neutrophil     | Arm-level Deletion | 0.005715122 |
| HNSC        | Neutrophil     | Diploid/Normal     | 1           |
| HNSC        | Neutrophil     | Arm-level Gain     | 0.696824904 |
| HNSC        | Neutrophil     | High Amplification | 0.390504579 |
| HNSC        | Dendritic Cell | Arm-level Deletion | 0.008820409 |
| HNSC        | Dendritic Cell | Diploid/Normal     | 1           |
| HNSC        | Dendritic Cell | Arm-level Gain     | 0.089163903 |
| HNSC        | Dendritic Cell | High Amplification | 0.111062386 |
| HNSC-HPVneg | B Cell         | Arm-level Deletion | 0.913615981 |
| HNSC-HPVneg | B Cell         | Diploid/Normal     | 1           |
| HNSC-HPVneg | B Cell         | Arm-level Gain     | 0.197053737 |
| HNSC-HPVneg | B Cell         | High Amplification | 0.225902185 |
| HNSC-HPVneg | CD8+ T Cell    | Arm-level Deletion | 0.094905213 |
| HNSC-HPVneg | CD8+ T Cell    | Diploid/Normal     | 1           |
| HNSC-HPVneg | CD8+ T Cell    | Arm-level Gain     | 0.141524947 |
| HNSC-HPVneg | CD8+ T Cell    | High Amplification | 0.057219535 |
| HNSC-HPVneg | CD4+ T Cell    | Arm-level Deletion | 0.312276234 |
| HNSC-HPVneg | CD4+ T Cell    | Diploid/Normal     | 1           |
| HNSC-HPVneg | CD4+ T Cell    | Arm-level Gain     | 0.855608393 |
| HNSC-HPVneg | CD4+ T Cell    | High Amplification | 0.565765813 |
| HNSC-HPVneg | Macrophage     | Arm-level Deletion | 0.542102267 |
| HNSC-HPVneg | Macrophage     | Diploid/Normal     | 1           |
| HNSC-HPVneg | Macrophage     | Arm-level Gain     | 0.865527164 |
| HNSC-HPVneg | Macrophage     | High Amplification | 0.369761092 |
| HNSC-HPVneg | Neutrophil     | Arm-level Deletion | 0.019143692 |
| HNSC-HPVneg | Neutrophil     | Diploid/Normal     | 1           |
| HNSC-HPVneg | Neutrophil     | Arm-level Gain     | 0.549330117 |
| HNSC-HPVneg | Neutrophil     | High Amplification | 0.480453832 |
| HNSC-HPVneg | Dendritic Cell | Arm-level Deletion | 0.072265549 |
| HNSC-HPVneg | Dendritic Cell | Diploid/Normal     | 1           |
| HNSC-HPVneg | Dendritic Cell | Arm-level Gain     | 0.546239622 |
| HNSC-HPVneg | Dendritic Cell | High Amplification | 0.443839993 |
| HNSC-HPVpos | B Cell         | Arm-level Deletion | 0.576977423 |
| HNSC-HPVpos | B Cell         | Diploid/Normal     | 1           |
| HNSC-HPVpos | B Cell         | Arm-level Gain     | 0.138361754 |
| HNSC-HPVpos | B Cell         | High Amplification | 1           |
| HNSC-HPVpos | CD8+ T Cell    | Arm-level Deletion | 0.24559246  |
| HNSC-HPVpos | CD8+ T Cell    | Diploid/Normal     | 1           |
| HNSC-HPVpos | CD8+ T Cell    | Arm-level Gain     | 0.185678147 |
| HNSC-HPVpos | CD8+ T Cell    | High Amplification | 1           |
| HNSC-HPVpos | CD4+ T Cell    | Arm-level Deletion | 0.885868474 |
| HNSC-HPVpos | CD4+ T Cell    | Diploid/Normal     | 1           |
| HNSC-HPVpos | CD4+ T Cell    | Arm-level Gain     | 0.345996995 |
| HNSC-HPVpos | CD4+ T Cell    | High Amplification | 1           |
| HNSC-HPVpos | Macrophage     | Arm-level Deletion | 0.550824639 |
| HNSC-HPVpos | Macrophage     | Diploid/Normal     | 1           |
| HNSC-HPVpos | Macrophage     | Arm-level Gain     | 0.282452886 |
| HNSC-HPVpos | Macrophage     | High Amplification | 1           |

|             |                |                    |             |
|-------------|----------------|--------------------|-------------|
| HNSC-HPVpos | Neutrophil     | Arm-level Deletion | 0.458605559 |
| HNSC-HPVpos | Neutrophil     | Diploid/Normal     | 1           |
| HNSC-HPVpos | Neutrophil     | Arm-level Gain     | 0.994953612 |
| HNSC-HPVpos | Neutrophil     | High Amplification | 1           |
| HNSC-HPVpos | Dendritic Cell | Arm-level Deletion | 0.334504078 |
| HNSC-HPVpos | Dendritic Cell | Diploid/Normal     | 1           |
| HNSC-HPVpos | Dendritic Cell | Arm-level Gain     | 0.204336156 |
| HNSC-HPVpos | Dendritic Cell | High Amplification | 1           |
| KICH        | B Cell         | Arm-level Deletion | 0.178571452 |
| KICH        | B Cell         | Diploid/Normal     | 1           |
| KICH        | B Cell         | Arm-level Gain     | 0.349292334 |
| KICH        | B Cell         | High Amplification | 1           |
| KICH        | CD8+ T Cell    | Arm-level Deletion | 0.781832315 |
| KICH        | CD8+ T Cell    | Diploid/Normal     | 1           |
| KICH        | CD8+ T Cell    | Arm-level Gain     | 0.144677768 |
| KICH        | CD8+ T Cell    | High Amplification | 1           |
| KICH        | CD4+ T Cell    | Arm-level Deletion | 0.055585174 |
| KICH        | CD4+ T Cell    | Diploid/Normal     | 1           |
| KICH        | CD4+ T Cell    | Arm-level Gain     | 0.059236652 |
| KICH        | CD4+ T Cell    | High Amplification | 1           |
| KICH        | Macrophage     | Arm-level Deletion | 0.122013318 |
| KICH        | Macrophage     | Diploid/Normal     | 1           |
| KICH        | Macrophage     | Arm-level Gain     | 0.916494828 |
| KICH        | Macrophage     | High Amplification | 1           |
| KICH        | Neutrophil     | Arm-level Deletion | 0.855419094 |
| KICH        | Neutrophil     | Diploid/Normal     | 1           |
| KICH        | Neutrophil     | Arm-level Gain     | 0.426480012 |
| KICH        | Neutrophil     | High Amplification | 1           |
| KICH        | Dendritic Cell | Arm-level Deletion | 0.001675069 |
| KICH        | Dendritic Cell | Diploid/Normal     | 1           |
| KICH        | Dendritic Cell | Arm-level Gain     | 0.625602738 |
| KICH        | Dendritic Cell | High Amplification | 1           |
| KIRC        | B Cell         | Deep Deletion      | 1           |
| KIRC        | B Cell         | Arm-level Deletion | 0.95770001  |
| KIRC        | B Cell         | Diploid/Normal     | 1           |
| KIRC        | B Cell         | Arm-level Gain     | 0.868226603 |
| KIRC        | B Cell         | High Amplification | 0.689007716 |
| KIRC        | CD8+ T Cell    | Deep Deletion      | 1           |
| KIRC        | CD8+ T Cell    | Arm-level Deletion | 0.876703185 |
| KIRC        | CD8+ T Cell    | Diploid/Normal     | 1           |
| KIRC        | CD8+ T Cell    | Arm-level Gain     | 0.016409975 |
| KIRC        | CD8+ T Cell    | High Amplification | 0.338675726 |
| KIRC        | CD4+ T Cell    | Deep Deletion      | 1           |
| KIRC        | CD4+ T Cell    | Arm-level Deletion | 0.054994542 |
| KIRC        | CD4+ T Cell    | Diploid/Normal     | 1           |
| KIRC        | CD4+ T Cell    | Arm-level Gain     | 0.231270948 |
| KIRC        | CD4+ T Cell    | High Amplification | 0.792003261 |
| KIRC        | Macrophage     | Deep Deletion      | 1           |
| KIRC        | Macrophage     | Arm-level Deletion | 0.948487595 |
| KIRC        | Macrophage     | Diploid/Normal     | 1           |
| KIRC        | Macrophage     | Arm-level Gain     | 0.775477625 |
| KIRC        | Macrophage     | High Amplification | 0.296995985 |
| KIRC        | Neutrophil     | Deep Deletion      | 1           |
| KIRC        | Neutrophil     | Arm-level Deletion | 0.198215032 |
| KIRC        | Neutrophil     | Diploid/Normal     | 1           |
| KIRC        | Neutrophil     | Arm-level Gain     | 0.648899177 |
| KIRC        | Neutrophil     | High Amplification | 0.031631306 |
| KIRC        | Dendritic Cell | Deep Deletion      | 1           |

|      |                |                    |             |
|------|----------------|--------------------|-------------|
| KIRC | Dendritic Cell | Arm-level Deletion | 0.800080624 |
| KIRC | Dendritic Cell | Diploid/Normal     | 1           |
| KIRC | Dendritic Cell | Arm-level Gain     | 0.549972753 |
| KIRC | Dendritic Cell | High Amplification | 0.875353625 |
| KIRP | B Cell         | Arm-level Deletion | 0.671081257 |
| KIRP | B Cell         | Diploid/Normal     | 1           |
| KIRP | B Cell         | Arm-level Gain     | 0.886600571 |
| KIRP | CD8+ T Cell    | Arm-level Deletion | 0.754219338 |
| KIRP | CD8+ T Cell    | Diploid/Normal     | 1           |
| KIRP | CD8+ T Cell    | Arm-level Gain     | 0.512873332 |
| KIRP | CD4+ T Cell    | Arm-level Deletion | 0.402776434 |
| KIRP | CD4+ T Cell    | Diploid/Normal     | 1           |
| KIRP | CD4+ T Cell    | Arm-level Gain     | 0.708430859 |
| KIRP | Macrophage     | Arm-level Deletion | 0.093701016 |
| KIRP | Macrophage     | Diploid/Normal     | 1           |
| KIRP | Macrophage     | Arm-level Gain     | 0.15262797  |
| KIRP | Neutrophil     | Arm-level Deletion | 0.477856811 |
| KIRP | Neutrophil     | Diploid/Normal     | 1           |
| KIRP | Neutrophil     | Arm-level Gain     | 0.026722432 |
| KIRP | Dendritic Cell | Arm-level Deletion | 0.488233792 |
| KIRP | Dendritic Cell | Diploid/Normal     | 1           |
| KIRP | Dendritic Cell | Arm-level Gain     | 0.022992172 |
| LGG  | B Cell         | Arm-level Deletion | 0.113844322 |
| LGG  | B Cell         | Diploid/Normal     | 1           |
| LGG  | B Cell         | Arm-level Gain     | 0.042063977 |
| LGG  | B Cell         | High Amplification | 1           |
| LGG  | CD8+ T Cell    | Arm-level Deletion | 0.227699848 |
| LGG  | CD8+ T Cell    | Diploid/Normal     | 1           |
| LGG  | CD8+ T Cell    | Arm-level Gain     | 0.807415863 |
| LGG  | CD8+ T Cell    | High Amplification | 1           |
| LGG  | CD4+ T Cell    | Arm-level Deletion | 0.495014492 |
| LGG  | CD4+ T Cell    | Diploid/Normal     | 1           |
| LGG  | CD4+ T Cell    | Arm-level Gain     | 0.042913777 |
| LGG  | CD4+ T Cell    | High Amplification | 1           |
| LGG  | Macrophage     | Arm-level Deletion | 0.652961727 |
| LGG  | Macrophage     | Diploid/Normal     | 1           |
| LGG  | Macrophage     | Arm-level Gain     | 0.162796472 |
| LGG  | Macrophage     | High Amplification | 1           |
| LGG  | Neutrophil     | Arm-level Deletion | 0.266067741 |
| LGG  | Neutrophil     | Diploid/Normal     | 1           |
| LGG  | Neutrophil     | Arm-level Gain     | 0.23458936  |
| LGG  | Neutrophil     | High Amplification | 1           |
| LGG  | Dendritic Cell | Arm-level Deletion | 0.160304904 |
| LGG  | Dendritic Cell | Diploid/Normal     | 1           |
| LGG  | Dendritic Cell | Arm-level Gain     | 0.189593543 |
| LGG  | Dendritic Cell | High Amplification | 1           |
| LIHC | B Cell         | Arm-level Deletion | 0.680243872 |
| LIHC | B Cell         | Diploid/Normal     | 1           |
| LIHC | B Cell         | Arm-level Gain     | 0.383960416 |
| LIHC | B Cell         | High Amplification | 0.246925876 |
| LIHC | CD8+ T Cell    | Arm-level Deletion | 0.59676081  |
| LIHC | CD8+ T Cell    | Diploid/Normal     | 1           |
| LIHC | CD8+ T Cell    | Arm-level Gain     | 0.130085535 |
| LIHC | CD8+ T Cell    | High Amplification | 0.101961127 |
| LIHC | CD4+ T Cell    | Arm-level Deletion | 0.762731211 |
| LIHC | CD4+ T Cell    | Diploid/Normal     | 1           |
| LIHC | CD4+ T Cell    | Arm-level Gain     | 0.276649418 |
| LIHC | CD4+ T Cell    | High Amplification | 0.372360491 |



|      |                |                    |             |
|------|----------------|--------------------|-------------|
| LIHC | Macrophage     | Arm-level Deletion | 0.825210578 |
| LIHC | Macrophage     | Diploid/Normal     | 1           |
| LIHC | Macrophage     | Arm-level Gain     | 0.049643278 |
| LIHC | Macrophage     | High Amplification | 0.575971225 |
| LIHC | Neutrophil     | Arm-level Deletion | 0.609917789 |
| LIHC | Neutrophil     | Diploid/Normal     | 1           |
| LIHC | Neutrophil     | Arm-level Gain     | 0.102386494 |
| LIHC | Neutrophil     | High Amplification | 0.627516228 |
| LIHC | Dendritic Cell | Arm-level Deletion | 0.880265554 |
| LIHC | Dendritic Cell | Diploid/Normal     | 1           |
| LIHC | Dendritic Cell | Arm-level Gain     | 0.265354506 |
| LIHC | Dendritic Cell | High Amplification | 0.480002914 |
| LUAD | B Cell         | Arm-level Deletion | 0.752853023 |
| LUAD | B Cell         | Diploid/Normal     | 1           |
| LUAD | B Cell         | Arm-level Gain     | 0.015529722 |
| LUAD | B Cell         | High Amplification | 0.007472054 |
| LUAD | CD8+ T Cell    | Arm-level Deletion | 0.110335427 |
| LUAD | CD8+ T Cell    | Diploid/Normal     | 1           |
| LUAD | CD8+ T Cell    | Arm-level Gain     | 0.165420792 |
| LUAD | CD8+ T Cell    | High Amplification | 0.412067286 |
| LUAD | CD4+ T Cell    | Arm-level Deletion | 0.386332267 |
| LUAD | CD4+ T Cell    | Diploid/Normal     | 1           |
| LUAD | CD4+ T Cell    | Arm-level Gain     | 0.00398294  |
| LUAD | CD4+ T Cell    | High Amplification | 0.000337632 |
| LUAD | Macrophage     | Arm-level Deletion | 0.068756089 |
| LUAD | Macrophage     | Diploid/Normal     | 1           |
| LUAD | Macrophage     | Arm-level Gain     | 0.004948267 |
| LUAD | Macrophage     | High Amplification | 0.003673349 |
| LUAD | Neutrophil     | Arm-level Deletion | 0.207179103 |
| LUAD | Neutrophil     | Diploid/Normal     | 1           |
| LUAD | Neutrophil     | Arm-level Gain     | 0.008824845 |
| LUAD | Neutrophil     | High Amplification | 0.0005581   |
| LUAD | Dendritic Cell | Arm-level Deletion | 0.723027498 |
| LUAD | Dendritic Cell | Diploid/Normal     | 1           |
| LUAD | Dendritic Cell | Arm-level Gain     | 0.001781465 |
| LUAD | Dendritic Cell | High Amplification | 4.77E-05    |
| LUSC | B Cell         | Deep Deletion      | 1           |
| LUSC | B Cell         | Arm-level Deletion | 0.00017037  |
| LUSC | B Cell         | Diploid/Normal     | 1           |
| LUSC | B Cell         | Arm-level Gain     | 0.008040943 |
| LUSC | B Cell         | High Amplification | 0.081451958 |
| LUSC | CD8+ T Cell    | Deep Deletion      | 1           |
| LUSC | CD8+ T Cell    | Arm-level Deletion | 0.237116098 |
| LUSC | CD8+ T Cell    | Diploid/Normal     | 1           |
| LUSC | CD8+ T Cell    | Arm-level Gain     | 0.408219296 |
| LUSC | CD8+ T Cell    | High Amplification | 0.613231273 |
| LUSC | CD4+ T Cell    | Deep Deletion      | 1           |
| LUSC | CD4+ T Cell    | Arm-level Deletion | 0.000104141 |
| LUSC | CD4+ T Cell    | Diploid/Normal     | 1           |
| LUSC | CD4+ T Cell    | Arm-level Gain     | 0.064058405 |
| LUSC | CD4+ T Cell    | High Amplification | 0.01144558  |
| LUSC | Macrophage     | Deep Deletion      | 1           |
| LUSC | Macrophage     | Arm-level Deletion | 0.056946039 |
| LUSC | Macrophage     | Diploid/Normal     | 1           |
| LUSC | Macrophage     | Arm-level Gain     | 0.414464596 |
| LUSC | Macrophage     | High Amplification | 0.170647712 |
| LUSC | Neutrophil     | Deep Deletion      | 1           |
| LUSC | Neutrophil     | Arm-level Deletion | 0.060090629 |

|      |                |                    |             |
|------|----------------|--------------------|-------------|
| LUSC | Neutrophil     | Diploid/Normal     | 1           |
| LUSC | Neutrophil     | Arm-level Gain     | 0.680956978 |
| LUSC | Neutrophil     | High Amplification | 0.286188901 |
| LUSC | Dendritic Cell | Deep Deletion      | 1           |
| LUSC | Dendritic Cell | Arm-level Deletion | 0.007237345 |
| LUSC | Dendritic Cell | Diploid/Normal     | 1           |
| LUSC | Dendritic Cell | Arm-level Gain     | 0.18483543  |
| LUSC | Dendritic Cell | High Amplification | 0.279659943 |
| MESO | B Cell         | Deep Deletion      | 0.806230068 |
| MESO | B Cell         | Arm-level Deletion | 0.463280008 |
| MESO | B Cell         | Diploid/Normal     | 1           |
| MESO | B Cell         | Arm-level Gain     | 0.465809518 |
| MESO | CD8+ T Cell    | Deep Deletion      | 0.240671446 |
| MESO | CD8+ T Cell    | Arm-level Deletion | 0.801232987 |
| MESO | CD8+ T Cell    | Diploid/Normal     | 1           |
| MESO | CD8+ T Cell    | Arm-level Gain     | 0.273868392 |
| MESO | CD4+ T Cell    | Deep Deletion      | 0.502883343 |
| MESO | CD4+ T Cell    | Arm-level Deletion | 0.932933328 |
| MESO | CD4+ T Cell    | Diploid/Normal     | 1           |
| MESO | CD4+ T Cell    | Arm-level Gain     | 0.034693378 |
| MESO | Macrophage     | Deep Deletion      | 0.681369474 |
| MESO | Macrophage     | Arm-level Deletion | 0.117551332 |
| MESO | Macrophage     | Diploid/Normal     | 1           |
| MESO | Macrophage     | Arm-level Gain     | 0.862736204 |
| MESO | Neutrophil     | Deep Deletion      | 4.23E-06    |
| MESO | Neutrophil     | Arm-level Deletion | 0.208521871 |
| MESO | Neutrophil     | Diploid/Normal     | 1           |
| MESO | Neutrophil     | Arm-level Gain     | 0.018779916 |
| MESO | Dendritic Cell | Deep Deletion      | 0.717367864 |
| MESO | Dendritic Cell | Arm-level Deletion | 0.307765821 |
| MESO | Dendritic Cell | Diploid/Normal     | 1           |
| MESO | Dendritic Cell | Arm-level Gain     | 0.819924429 |
| OV   | B Cell         | Arm-level Deletion | 0.197137744 |
| OV   | B Cell         | Diploid/Normal     | 1           |
| OV   | B Cell         | Arm-level Gain     | 0.01484951  |
| OV   | B Cell         | High Amplification | 0.11075478  |
| OV   | CD8+ T Cell    | Arm-level Deletion | 0.21468677  |
| OV   | CD8+ T Cell    | Diploid/Normal     | 1           |
| OV   | CD8+ T Cell    | Arm-level Gain     | 0.844298763 |
| OV   | CD8+ T Cell    | High Amplification | 0.91268083  |
| OV   | CD4+ T Cell    | Arm-level Deletion | 0.568562375 |
| OV   | CD4+ T Cell    | Diploid/Normal     | 1           |
| OV   | CD4+ T Cell    | Arm-level Gain     | 0.91134183  |
| OV   | CD4+ T Cell    | High Amplification | 0.77439692  |
| OV   | Macrophage     | Arm-level Deletion | 0.484814595 |
| OV   | Macrophage     | Diploid/Normal     | 1           |
| OV   | Macrophage     | Arm-level Gain     | 0.042760352 |
| OV   | Macrophage     | High Amplification | 0.989064423 |
| OV   | Neutrophil     | Arm-level Deletion | 0.464151621 |
| OV   | Neutrophil     | Diploid/Normal     | 1           |
| OV   | Neutrophil     | Arm-level Gain     | 0.712527742 |
| OV   | Neutrophil     | High Amplification | 0.830053469 |
| OV   | Dendritic Cell | Arm-level Deletion | 0.166470215 |
| OV   | Dendritic Cell | Diploid/Normal     | 1           |
| OV   | Dendritic Cell | Arm-level Gain     | 0.552282845 |
| OV   | Dendritic Cell | High Amplification | 0.468332448 |
| PAAD | B Cell         | Arm-level Deletion | 0.019191243 |
| PAAD | B Cell         | Diploid/Normal     | 1           |

|      |                |                    |             |
|------|----------------|--------------------|-------------|
| PAAD | B Cell         | Arm-level Gain     | 0.031896219 |
| PAAD | B Cell         | High Amplification | 0.050359578 |
| PAAD | CD8+ T Cell    | Arm-level Deletion | 0.195022464 |
| PAAD | CD8+ T Cell    | Diploid/Normal     | 1           |
| PAAD | CD8+ T Cell    | Arm-level Gain     | 0.280977842 |
| PAAD | CD8+ T Cell    | High Amplification | 0.278396709 |
| PAAD | CD4+ T Cell    | Arm-level Deletion | 0.023690478 |
| PAAD | CD4+ T Cell    | Diploid/Normal     | 1           |
| PAAD | CD4+ T Cell    | Arm-level Gain     | 0.003655699 |
| PAAD | CD4+ T Cell    | High Amplification | 0.314201187 |
| PAAD | Macrophage     | Arm-level Deletion | 0.15548009  |
| PAAD | Macrophage     | Diploid/Normal     | 1           |
| PAAD | Macrophage     | Arm-level Gain     | 0.999938312 |
| PAAD | Macrophage     | High Amplification | 0.800786148 |
| PAAD | Neutrophil     | Arm-level Deletion | 0.316036847 |
| PAAD | Neutrophil     | Diploid/Normal     | 1           |
| PAAD | Neutrophil     | Arm-level Gain     | 0.505047443 |
| PAAD | Neutrophil     | High Amplification | 0.825473471 |
| PAAD | Dendritic Cell | Arm-level Deletion | 0.360054436 |
| PAAD | Dendritic Cell | Diploid/Normal     | 1           |
| PAAD | Dendritic Cell | Arm-level Gain     | 0.705324934 |
| PAAD | Dendritic Cell | High Amplification | 0.408740213 |
| PCPG | B Cell         | Arm-level Deletion | 0.145424965 |
| PCPG | B Cell         | Diploid/Normal     | 1           |
| PCPG | B Cell         | Arm-level Gain     | 0.66617289  |
| PCPG | B Cell         | High Amplification | 0.7899961   |
| PCPG | CD8+ T Cell    | Arm-level Deletion | 0.532329139 |
| PCPG | CD8+ T Cell    | Diploid/Normal     | 1           |
| PCPG | CD8+ T Cell    | Arm-level Gain     | 0.733727176 |
| PCPG | CD8+ T Cell    | High Amplification | 0.932151829 |
| PCPG | CD4+ T Cell    | Arm-level Deletion | 0.582718537 |
| PCPG | CD4+ T Cell    | Diploid/Normal     | 1           |
| PCPG | CD4+ T Cell    | Arm-level Gain     | 0.801331766 |
| PCPG | CD4+ T Cell    | High Amplification | 0.056186739 |
| PCPG | Macrophage     | Arm-level Deletion | 0.706457504 |
| PCPG | Macrophage     | Diploid/Normal     | 1           |
| PCPG | Macrophage     | Arm-level Gain     | 0.751346298 |
| PCPG | Macrophage     | High Amplification | 0.86265942  |
| PCPG | Neutrophil     | Arm-level Deletion | 0.233574665 |
| PCPG | Neutrophil     | Diploid/Normal     | 1           |
| PCPG | Neutrophil     | Arm-level Gain     | 0.139227978 |
| PCPG | Neutrophil     | High Amplification | 0.965131111 |
| PCPG | Dendritic Cell | Arm-level Deletion | 0.078461317 |
| PCPG | Dendritic Cell | Diploid/Normal     | 1           |
| PCPG | Dendritic Cell | Arm-level Gain     | 0.717799838 |
| PCPG | Dendritic Cell | High Amplification | 0.228764367 |
| PRAD | B Cell         | Deep Deletion      | 0.935436882 |
| PRAD | B Cell         | Arm-level Deletion | 0.606643479 |
| PRAD | B Cell         | Diploid/Normal     | 1           |
| PRAD | B Cell         | Arm-level Gain     | 0.452589927 |
| PRAD | B Cell         | High Amplification | 0.368802047 |
| PRAD | CD8+ T Cell    | Deep Deletion      | 0.905005255 |
| PRAD | CD8+ T Cell    | Arm-level Deletion | 0.875775857 |
| PRAD | CD8+ T Cell    | Diploid/Normal     | 1           |
| PRAD | CD8+ T Cell    | Arm-level Gain     | 0.34405176  |
| PRAD | CD8+ T Cell    | High Amplification | 0.455019107 |
| PRAD | CD4+ T Cell    | Deep Deletion      | 0.444058935 |
| PRAD | CD4+ T Cell    | Arm-level Deletion | 0.398971486 |

|      |                |                    |             |
|------|----------------|--------------------|-------------|
| PRAD | CD4+ T Cell    | Diploid/Normal     | 1           |
| PRAD | CD4+ T Cell    | Arm-level Gain     | 0.87684277  |
| PRAD | CD4+ T Cell    | High Amplification | 0.11049785  |
| PRAD | Macrophage     | Deep Deletion      | 0.963476011 |
| PRAD | Macrophage     | Arm-level Deletion | 0.816926028 |
| PRAD | Macrophage     | Diploid/Normal     | 1           |
| PRAD | Macrophage     | Arm-level Gain     | 0.583048098 |
| PRAD | Macrophage     | High Amplification | 0.000410857 |
| PRAD | Neutrophil     | Deep Deletion      | 0.165272348 |
| PRAD | Neutrophil     | Arm-level Deletion | 0.95389178  |
| PRAD | Neutrophil     | Diploid/Normal     | 1           |
| PRAD | Neutrophil     | Arm-level Gain     | 0.781817521 |
| PRAD | Neutrophil     | High Amplification | 0.368121942 |
| PRAD | Dendritic Cell | Deep Deletion      | 0.607321305 |
| PRAD | Dendritic Cell | Arm-level Deletion | 0.89757881  |
| PRAD | Dendritic Cell | Diploid/Normal     | 1           |
| PRAD | Dendritic Cell | Arm-level Gain     | 0.912282317 |
| PRAD | Dendritic Cell | High Amplification | 0.217911445 |
| READ | B Cell         | Arm-level Deletion | 0.698480431 |
| READ | B Cell         | Diploid/Normal     | 1           |
| READ | B Cell         | Arm-level Gain     | 0.923086883 |
| READ | B Cell         | High Amplification | 0.037034391 |
| READ | CD8+ T Cell    | Arm-level Deletion | 0.182759976 |
| READ | CD8+ T Cell    | Diploid/Normal     | 1           |
| READ | CD8+ T Cell    | Arm-level Gain     | 0.399025869 |
| READ | CD8+ T Cell    | High Amplification | 0.635806702 |
| READ | CD4+ T Cell    | Arm-level Deletion | 0.464254727 |
| READ | CD4+ T Cell    | Diploid/Normal     | 1           |
| READ | CD4+ T Cell    | Arm-level Gain     | 0.115160948 |
| READ | CD4+ T Cell    | High Amplification | 0.542779479 |
| READ | Macrophage     | Arm-level Deletion | 0.70900053  |
| READ | Macrophage     | Diploid/Normal     | 1           |
| READ | Macrophage     | Arm-level Gain     | 0.04814409  |
| READ | Macrophage     | High Amplification | 0.1946652   |
| READ | Neutrophil     | Arm-level Deletion | 0.012008406 |
| READ | Neutrophil     | Diploid/Normal     | 1           |
| READ | Neutrophil     | Arm-level Gain     | 0.299548017 |
| READ | Neutrophil     | High Amplification | 0.380023762 |
| READ | Dendritic Cell | Arm-level Deletion | 0.286723598 |
| READ | Dendritic Cell | Diploid/Normal     | 1           |
| READ | Dendritic Cell | Arm-level Gain     | 0.558972724 |
| READ | Dendritic Cell | High Amplification | 0.190660011 |
| SARC | B Cell         | Deep Deletion      | 1           |
| SARC | B Cell         | Arm-level Deletion | 0.017339242 |
| SARC | B Cell         | Diploid/Normal     | 1           |
| SARC | B Cell         | Arm-level Gain     | 0.404513293 |
| SARC | B Cell         | High Amplification | 0.001343253 |
| SARC | CD8+ T Cell    | Deep Deletion      | 1           |
| SARC | CD8+ T Cell    | Arm-level Deletion | 0.365493482 |
| SARC | CD8+ T Cell    | Diploid/Normal     | 1           |
| SARC | CD8+ T Cell    | Arm-level Gain     | 0.41399566  |
| SARC | CD8+ T Cell    | High Amplification | 0.048907311 |
| SARC | CD4+ T Cell    | Deep Deletion      | 1           |
| SARC | CD4+ T Cell    | Arm-level Deletion | 0.599770826 |
| SARC | CD4+ T Cell    | Diploid/Normal     | 1           |
| SARC | CD4+ T Cell    | Arm-level Gain     | 0.044362154 |
| SARC | CD4+ T Cell    | High Amplification | 3.13E-05    |
| SARC | Macrophage     | Deep Deletion      | 1           |

|      |                |                    |             |
|------|----------------|--------------------|-------------|
| SARC | Macrophage     | Arm-level Deletion | 0.373115455 |
| SARC | Macrophage     | Diploid/Normal     | 1           |
| SARC | Macrophage     | Arm-level Gain     | 0.177744662 |
| SARC | Macrophage     | High Amplification | 0.019790142 |
| SARC | Neutrophil     | Deep Deletion      | 1           |
| SARC | Neutrophil     | Arm-level Deletion | 0.669647241 |
| SARC | Neutrophil     | Diploid/Normal     | 1           |
| SARC | Neutrophil     | Arm-level Gain     | 0.932097846 |
| SARC | Neutrophil     | High Amplification | 0.163467719 |
| SARC | Dendritic Cell | Deep Deletion      | 1           |
| SARC | Dendritic Cell | Arm-level Deletion | 0.342274087 |
| SARC | Dendritic Cell | Diploid/Normal     | 1           |
| SARC | Dendritic Cell | Arm-level Gain     | 0.401786978 |
| SARC | Dendritic Cell | High Amplification | 0.012189972 |
| SKCM | B Cell         | Arm-level Deletion | 0.012235654 |
| SKCM | B Cell         | Diploid/Normal     | 1           |
| SKCM | B Cell         | Arm-level Gain     | 0.003046353 |
| SKCM | B Cell         | High Amplification | 0.000109137 |
| SKCM | CD8+ T Cell    | Arm-level Deletion | 7.58E-05    |
| SKCM | CD8+ T Cell    | Diploid/Normal     | 1           |
| SKCM | CD8+ T Cell    | Arm-level Gain     | 0.051057909 |
| SKCM | CD8+ T Cell    | High Amplification | 0.000459608 |
| SKCM | CD4+ T Cell    | Arm-level Deletion | 0.05202173  |
| SKCM | CD4+ T Cell    | Diploid/Normal     | 1           |
| SKCM | CD4+ T Cell    | Arm-level Gain     | 0.013273876 |
| SKCM | CD4+ T Cell    | High Amplification | 8.25E-06    |
| SKCM | Macrophage     | Arm-level Deletion | 0.175214796 |
| SKCM | Macrophage     | Diploid/Normal     | 1           |
| SKCM | Macrophage     | Arm-level Gain     | 0.485354438 |
| SKCM | Macrophage     | High Amplification | 0.078055991 |
| SKCM | Neutrophil     | Arm-level Deletion | 0.014239462 |
| SKCM | Neutrophil     | Diploid/Normal     | 1           |
| SKCM | Neutrophil     | Arm-level Gain     | 0.051088147 |
| SKCM | Neutrophil     | High Amplification | 0.023861872 |
| SKCM | Dendritic Cell | Arm-level Deletion | 0.004098064 |
| SKCM | Dendritic Cell | Diploid/Normal     | 1           |
| SKCM | Dendritic Cell | Arm-level Gain     | 0.033009991 |
| SKCM | Dendritic Cell | High Amplification | 0.002588712 |
| STAD | B Cell         | Deep Deletion      | 0.5370205   |
| STAD | B Cell         | Arm-level Deletion | 0.169911327 |
| STAD | B Cell         | Diploid/Normal     | 1           |
| STAD | B Cell         | Arm-level Gain     | 0.199244839 |
| STAD | B Cell         | High Amplification | 0.994184079 |
| STAD | CD8+ T Cell    | Deep Deletion      | 0.727412246 |
| STAD | CD8+ T Cell    | Arm-level Deletion | 2.08E-06    |
| STAD | CD8+ T Cell    | Diploid/Normal     | 1           |
| STAD | CD8+ T Cell    | Arm-level Gain     | 0.002163282 |
| STAD | CD8+ T Cell    | High Amplification | 0.059181468 |
| STAD | CD4+ T Cell    | Deep Deletion      | 0.67008271  |
| STAD | CD4+ T Cell    | Arm-level Deletion | 0.030671709 |
| STAD | CD4+ T Cell    | Diploid/Normal     | 1           |
| STAD | CD4+ T Cell    | Arm-level Gain     | 0.048778622 |
| STAD | CD4+ T Cell    | High Amplification | 0.934580058 |
| STAD | Macrophage     | Deep Deletion      | 9.56E-10    |
| STAD | Macrophage     | Arm-level Deletion | 0.001052413 |
| STAD | Macrophage     | Diploid/Normal     | 1           |
| STAD | Macrophage     | Arm-level Gain     | 0.005147515 |
| STAD | Macrophage     | High Amplification | 0.081881362 |

|      |                |                    |             |
|------|----------------|--------------------|-------------|
| STAD | Neutrophil     | Deep Deletion      | 0.536374847 |
| STAD | Neutrophil     | Arm-level Deletion | 0.008511961 |
| STAD | Neutrophil     | Diploid/Normal     | 1           |
| STAD | Neutrophil     | Arm-level Gain     | 0.069709365 |
| STAD | Neutrophil     | High Amplification | 0.793119836 |
| STAD | Dendritic Cell | Deep Deletion      | 0.30205392  |
| STAD | Dendritic Cell | Arm-level Deletion | 0.000157875 |
| STAD | Dendritic Cell | Diploid/Normal     | 1           |
| STAD | Dendritic Cell | Arm-level Gain     | 0.00048019  |
| STAD | Dendritic Cell | High Amplification | 0.223286946 |
| TGCT | B Cell         | Deep Deletion      | 1           |
| TGCT | B Cell         | Arm-level Deletion | 0.038019887 |
| TGCT | B Cell         | Diploid/Normal     | 1           |
| TGCT | B Cell         | Arm-level Gain     | 0.659655988 |
| TGCT | B Cell         | High Amplification | 0.52620487  |
| TGCT | CD8+ T Cell    | Deep Deletion      | 1           |
| TGCT | CD8+ T Cell    | Arm-level Deletion | 0.890031249 |
| TGCT | CD8+ T Cell    | Diploid/Normal     | 1           |
| TGCT | CD8+ T Cell    | Arm-level Gain     | 0.121751174 |
| TGCT | CD8+ T Cell    | High Amplification | 0.068743632 |
| TGCT | CD4+ T Cell    | Deep Deletion      | 1           |
| TGCT | CD4+ T Cell    | Arm-level Deletion | 0.243861494 |
| TGCT | CD4+ T Cell    | Diploid/Normal     | 1           |
| TGCT | CD4+ T Cell    | Arm-level Gain     | 0.94322294  |
| TGCT | CD4+ T Cell    | High Amplification | 0.708715687 |
| TGCT | Macrophage     | Deep Deletion      | 1           |
| TGCT | Macrophage     | Arm-level Deletion | 0.543749329 |
| TGCT | Macrophage     | Diploid/Normal     | 1           |
| TGCT | Macrophage     | Arm-level Gain     | 0.93718841  |
| TGCT | Macrophage     | High Amplification | 0.357580584 |
| TGCT | Neutrophil     | Deep Deletion      | 1           |
| TGCT | Neutrophil     | Arm-level Deletion | 0.516684596 |
| TGCT | Neutrophil     | Diploid/Normal     | 1           |
| TGCT | Neutrophil     | Arm-level Gain     | 0.122056104 |
| TGCT | Neutrophil     | High Amplification | 0.578921366 |
| TGCT | Dendritic Cell | Deep Deletion      | 1           |
| TGCT | Dendritic Cell | Arm-level Deletion | 0.295444919 |
| TGCT | Dendritic Cell | Diploid/Normal     | 1           |
| TGCT | Dendritic Cell | Arm-level Gain     | 0.91292108  |
| TGCT | Dendritic Cell | High Amplification | 0.917011236 |
| THCA | B Cell         | Arm-level Deletion | 3.92E-10    |
| THCA | B Cell         | Diploid/Normal     | 1           |
| THCA | B Cell         | Arm-level Gain     | 0.243186773 |
| THCA | CD8+ T Cell    | Arm-level Deletion | 0.06892855  |
| THCA | CD8+ T Cell    | Diploid/Normal     | 1           |
| THCA | CD8+ T Cell    | Arm-level Gain     | 0.107637729 |
| THCA | CD4+ T Cell    | Arm-level Deletion | 0.001783542 |
| THCA | CD4+ T Cell    | Diploid/Normal     | 1           |
| THCA | CD4+ T Cell    | Arm-level Gain     | 0.751573079 |
| THCA | Macrophage     | Arm-level Deletion | 0.003495448 |
| THCA | Macrophage     | Diploid/Normal     | 1           |
| THCA | Macrophage     | Arm-level Gain     | 0.386387186 |
| THCA | Neutrophil     | Arm-level Deletion | 4.68E-06    |
| THCA | Neutrophil     | Diploid/Normal     | 1           |
| THCA | Neutrophil     | Arm-level Gain     | 0.582364507 |
| THCA | Dendritic Cell | Arm-level Deletion | 1.11E-07    |
| THCA | Dendritic Cell | Diploid/Normal     | 1           |
| THCA | Dendritic Cell | Arm-level Gain     | 0.430055694 |

|      |                |                    |             |
|------|----------------|--------------------|-------------|
| THYM | B Cell         | Arm-level Deletion | 0.973805067 |
| THYM | B Cell         | Diploid/Normal     | 1           |
| THYM | B Cell         | Arm-level Gain     | 0.519471546 |
| THYM | CD8+ T Cell    | Arm-level Deletion | 0.67866728  |
| THYM | CD8+ T Cell    | Diploid/Normal     | 1           |
| THYM | CD8+ T Cell    | Arm-level Gain     | 0.424833321 |
| THYM | CD4+ T Cell    | Arm-level Deletion | 0.026908438 |
| THYM | CD4+ T Cell    | Diploid/Normal     | 1           |
| THYM | CD4+ T Cell    | Arm-level Gain     | 0.169393374 |
| THYM | Macrophage     | Arm-level Deletion | 0.489841968 |
| THYM | Macrophage     | Diploid/Normal     | 1           |
| THYM | Macrophage     | Arm-level Gain     | 0.721679781 |
| THYM | Neutrophil     | Arm-level Deletion | 0.832343404 |
| THYM | Neutrophil     | Diploid/Normal     | 1           |
| THYM | Neutrophil     | Arm-level Gain     | 0.341259453 |
| THYM | Dendritic Cell | Arm-level Deletion | 0.094709146 |
| THYM | Dendritic Cell | Diploid/Normal     | 1           |
| THYM | Dendritic Cell | Arm-level Gain     | 0.072151567 |
| UCEC | B Cell         | Arm-level Deletion | 0.568903446 |
| UCEC | B Cell         | Diploid/Normal     | 1           |
| UCEC | B Cell         | Arm-level Gain     | 0.006265626 |
| UCEC | B Cell         | High Amplification | 0.716482556 |
| UCEC | CD8+ T Cell    | Arm-level Deletion | 0.619596929 |
| UCEC | CD8+ T Cell    | Diploid/Normal     | 1           |
| UCEC | CD8+ T Cell    | Arm-level Gain     | 0.002038957 |
| UCEC | CD8+ T Cell    | High Amplification | 0.881089856 |
| UCEC | CD4+ T Cell    | Arm-level Deletion | 0.077630428 |
| UCEC | CD4+ T Cell    | Diploid/Normal     | 1           |
| UCEC | CD4+ T Cell    | Arm-level Gain     | 0.032962086 |
| UCEC | CD4+ T Cell    | High Amplification | 0.688677026 |
| UCEC | Macrophage     | Arm-level Deletion | 0.81097893  |
| UCEC | Macrophage     | Diploid/Normal     | 1           |
| UCEC | Macrophage     | Arm-level Gain     | 0.407295301 |
| UCEC | Macrophage     | High Amplification | 0.556433494 |
| UCEC | Neutrophil     | Arm-level Deletion | 0.611383465 |
| UCEC | Neutrophil     | Diploid/Normal     | 1           |
| UCEC | Neutrophil     | Arm-level Gain     | 0.60005052  |
| UCEC | Neutrophil     | High Amplification | 0.339276082 |
| UCEC | Dendritic Cell | Arm-level Deletion | 0.863856978 |
| UCEC | Dendritic Cell | Diploid/Normal     | 1           |
| UCEC | Dendritic Cell | Arm-level Gain     | 1.11E-06    |
| UCEC | Dendritic Cell | High Amplification | 0.992753126 |
| UCS  | B Cell         | Deep Deletion      | 1           |
| UCS  | B Cell         | Arm-level Deletion | 0.354824385 |
| UCS  | B Cell         | Diploid/Normal     | 1           |
| UCS  | B Cell         | Arm-level Gain     | 0.638711847 |
| UCS  | B Cell         | High Amplification | 0.063461489 |
| UCS  | CD8+ T Cell    | Deep Deletion      | 1           |
| UCS  | CD8+ T Cell    | Arm-level Deletion | 0.798312241 |
| UCS  | CD8+ T Cell    | Diploid/Normal     | 1           |
| UCS  | CD8+ T Cell    | Arm-level Gain     | 0.569796647 |
| UCS  | CD8+ T Cell    | High Amplification | 0.887350479 |
| UCS  | CD4+ T Cell    | Deep Deletion      | 1           |
| UCS  | CD4+ T Cell    | Arm-level Deletion | 0.21956129  |
| UCS  | CD4+ T Cell    | Diploid/Normal     | 1           |
| UCS  | CD4+ T Cell    | Arm-level Gain     | 0.252750807 |
| UCS  | CD4+ T Cell    | High Amplification | 0.990333667 |
| UCS  | Macrophage     | Deep Deletion      | 1           |

|     |                |                    |             |
|-----|----------------|--------------------|-------------|
| UCS | Macrophage     | Arm-level Deletion | 0.531820317 |
| UCS | Macrophage     | Diploid/Normal     | 1           |
| UCS | Macrophage     | Arm-level Gain     | 0.407797462 |
| UCS | Macrophage     | High Amplication   | 0.419332262 |
| UCS | Neutrophil     | Deep Deletion      | 1           |
| UCS | Neutrophil     | Arm-level Deletion | 0.653766566 |
| UCS | Neutrophil     | Diploid/Normal     | 1           |
| UCS | Neutrophil     | Arm-level Gain     | 0.826542838 |
| UCS | Neutrophil     | High Amplication   | 0.367612595 |
| UCS | Dendritic Cell | Deep Deletion      | 1           |
| UCS | Dendritic Cell | Arm-level Deletion | 0.481077852 |
| UCS | Dendritic Cell | Diploid/Normal     | 1           |
| UCS | Dendritic Cell | Arm-level Gain     | 0.155568439 |
| UCS | Dendritic Cell | High Amplication   | 0.40528169  |
| UVM | B Cell         | Diploid/Normal     | 1           |
| UVM | B Cell         | Arm-level Gain     | 0.061400366 |
| UVM | B Cell         | High Amplication   | 0.22443017  |
| UVM | CD8+ T Cell    | Diploid/Normal     | 1           |
| UVM | CD8+ T Cell    | Arm-level Gain     | 0.029013603 |
| UVM | CD8+ T Cell    | High Amplication   | 0.313574185 |
| UVM | CD4+ T Cell    | Diploid/Normal     | 1           |
| UVM | CD4+ T Cell    | Arm-level Gain     | 0.207662592 |
| UVM | CD4+ T Cell    | High Amplication   | 0.39606942  |
| UVM | Macrophage     | Diploid/Normal     | 1           |
| UVM | Macrophage     | Arm-level Gain     | 0.763661802 |
| UVM | Macrophage     | High Amplication   | 0.006211851 |
| UVM | Neutrophil     | Diploid/Normal     | 1           |
| UVM | Neutrophil     | Arm-level Gain     | 0.205202309 |
| UVM | Neutrophil     | High Amplication   | 0.284309407 |
| UVM | Dendritic Cell | Diploid/Normal     | 1           |
| UVM | Dendritic Cell | Arm-level Gain     | 0.987421229 |
| UVM | Dendritic Cell | High Amplication   | 0.533172034 |

---
